# Supplementary material for: Essential Oils Biofilm Modulation Activity, Chemical and Machine Learning Analysis. Application on Staphylococcus aureus Isolates from Cystic Fibrosis Patients
Source: PubMed Central journal article supplement (PMC7730550; doi:10.3390/ijms21239258), 2020-12-04
Supplement: ijms-21-09258-s001.pdf [file ijms-21-09258-s001.pdf]

**Essential oils biofilm modulation activity chemical and machine learning analysis. Application on *Staphylococcus aureus* isolates from cystic fibrosis patients.**

**Rosanna Papa<sup>1,§</sup>, Stefania Garzoli<sup>2,§</sup>, Gianluca Vrenna<sup>3</sup>, Manuela Sabatino<sup>4,5</sup>, Michela Relucenti<sup>6</sup>, Orlando Donfrancesco<sup>7</sup>, Ersilia Vita Fiscarelli<sup>8</sup>, Marco Artini<sup>9</sup>, Laura Selan<sup>10,\*</sup> and Rino Ragno<sup>11,12,\*</sup>**

**Rosanna Papa<sup>1,§</sup>, Stefania Garzoli<sup>2,§</sup>, Gianluca Vrenna<sup>3</sup>, Manuela Sabatino<sup>4,5</sup>, Michela Relucenti<sup>6</sup>, Orlando Donfrancesco<sup>7</sup>, Ersilia Vita Fiscarelli<sup>8</sup>, Marco Artini<sup>9</sup>, Laura Selan<sup>10,\*</sup> and Rino Ragno<sup>11,12,\*</sup>**

<sup>1</sup> Department of Public Health and Infectious Diseases, Sapienza University, p.le Aldo Moro 5, 00185 Rome, Italy; [rosanna.papa@uniroma1.it](mailto:rosanna.papa@uniroma1.it)

<sup>2</sup> Department of Drug Chemistry and Technology, Sapienza University, p.le Aldo Moro 5, 00185 Rome, Italy; [stefania.garzoli@uniroma1.it](mailto:stefania.garzoli@uniroma1.it)

<sup>3</sup> Department of Public Health and Infectious Diseases, Sapienza University, p.le Aldo Moro 5, 00185 Rome, Italy; [gianluca.vrenna@uniroma1.it](mailto:gianluca.vrenna@uniroma1.it)

<sup>4</sup> Department of Drug Chemistry and Technology, Sapienza University, p.le Aldo Moro 5, 00185 Rome, Italy; [manuela.sabatino@uniroma1.it](mailto:manuela.sabatino@uniroma1.it)

<sup>5</sup> Rome Center for Molecular Design, Department of Drug Chemistry and Technology, Sapienza University, p.le Aldo Moro 5, 00185 Rome, Italy; [manuela.sabatino@uniroma1.it](mailto:manuela.sabatino@uniroma1.it)

<sup>6</sup> Department of Anatomy, Histology, Forensic Medicine and Orthopaedics, Sapienza University of Rome, via Alfonso Borelli 50, Rome, 00161, Italy; [michela.relucenti@uniroma1.it](mailto:michela.relucenti@uniroma1.it)

<sup>7</sup> Department of Anatomy, Histology, Forensic Medicine and Orthopaedics, Sapienza University of Rome, via Alfonso Borelli 50, Rome, 00161, Italy; [orlando.donfrancesco@uniroma1.it](mailto:orlando.donfrancesco@uniroma1.it)

<sup>8</sup> Paediatric and Laboratory Department. Children's Hospital and Institute Research Bambino Gesù, Italy; [evita.fiscarelli@opbg.net](mailto:evita.fiscarelli@opbg.net)

<sup>9</sup> Department of Public Health and Infectious Diseases, Sapienza University, p.le Aldo Moro 5, 00185 Rome, Italy; [marco.artini@uniroma1.it](mailto:marco.artini@uniroma1.it)

<sup>10</sup> Department of Public Health and Infectious Diseases, Sapienza University, p.le Aldo Moro 5, 00185 Rome, Italy; [laura.selan@uniroma1.it](mailto:laura.selan@uniroma1.it)

<sup>11</sup> Department of Drug Chemistry and Technology, Sapienza University, p.le Aldo Moro 5, 00185 Rome, Italy; [rino.ragno@uniroma1.it](mailto:rino.ragno@uniroma1.it)

<sup>12</sup> Rome Center for Molecular Design, Department of Drug Chemistry and Technology, Sapienza University, p.le Aldo Moro 5, 00185 Rome, Italy; [rino.ragno@uniroma1.it](mailto:rino.ragno@uniroma1.it)

**Table SM1.** Qualitative descriptors used for the unsupervised Machine Learning clusterization of *S. aureus* strains.

| <b>Descriptor Name</b>                    | <b>Parameter</b>                                 |
|-------------------------------------------|--------------------------------------------------|
| Type of sample                            | Esp: sputum; AT: hypopharyngeal suction          |
| Methicillin profile                       | MRSA e MSSA                                      |
| Phenotype                                 | Small colony variant, normal                     |
| Quinolones Sensitivity                    | Resistant or Susceptible                         |
| Trimethoprim/Sulfamethoxazole Sensitivity | Resistant or Susceptible                         |
| Erythromycin Sensitivity                  | Resistant or Susceptible                         |
| Clindamycin Sensitivity                   | Resistant or Susceptible                         |
| Linezolid Sensitivity                     | Resistant or Susceptible                         |
| Inducible Clindamycin resistance ability  | Positive or negative                             |
| Fungal Co-infection                       | <i>Scedosporium prolificans</i>                  |
| <i>P. aeruginosa</i> co-infection         | Positive or negative                             |
| <i>cftr</i> gene mutation                 | 621+1G>T/R553X<br>F508del/F508del<br>L636P/P499A |
| Biofilm formation                         | Strong, moderate or weak                         |

**Table SM2.** Phenotypical and genotypical characterization of 3 representative strains of *S. aureus*.

| ID pt | ID  | SAM | Date       | Str  | Ph | QUIN | B | ER | CLI | LIN | RCLI | CF | CPA | GENOTYPE        |
|-------|-----|-----|------------|------|----|------|---|----|-----|-----|------|----|-----|-----------------|
| 4     | 4S  | AT  | 2/20/2009  | MRSA | -  | S    | S | Nt | S   | S   | P    |    |     | 621+1G>T/R553X  |
| 5     | 5S  | ESP | 11/13/2009 | MRSA | -  | R    | S | Nt | R   | S   | N    | Sp |     | F508del/F508del |
| 19    | 19S | ESP | 6/15/2017  | MSSA | -  | S    | S | R  | R   | S   | P    |    | X   | L636P/P499A     |

The 3 *Staphylococcus aureus* clinical isolates and their characterization by several properties. **ID pt:** Patient Identification; **ID:** Strain Code; **SAM:** Sample; **Date:** Date of collection; **Str:** Strain; **Ph:** Phenotype; **QUIN:** Quinolones; **B:** Trimethoprim/Sulfamethoxazole; **ER:** Erythromycin; **CLI:** Clindamycin; **LIN:** Linezolid; **RCLI:** Inducible Clindamycin resistance; **CF:** Fungal Co-infection; **CPA:** *P. aeruginosa* co-infection; **GEN:** Pts Genotype; **Esp:** Sputum; **AT:** Hypopharyngeal Suction; **MRSA:** Methicillin Resistant *S. aureus*; **MSSA:** Methicillin Sensitive *S. aureus*; **R:** Resistant; **S:** Susceptible; **N:** Negative; **Nt:** Non tested; **Sp:** *Scedosporium prolificans*.

**Table SM3.** SEM OsO<sub>4</sub>-RR-TA-IL protocol and operating conditions for observation.

| <b>Steps</b>                | <b>OsO<sub>4</sub>-RR-TA-IL Protocol</b>             |
|-----------------------------|------------------------------------------------------|
| <b>Fixation</b>             | Glutaraldehyde 2,5% in PB 0.1 M pH 7.4 at least 48 h |
| <b>Washing</b>              | 10 min x2 times in PB 0.1 M pH 7.4                   |
| <b>Postfixation</b>         | OsO <sub>4</sub> 2%+RR 0.2% 1:1 solution, 1 h        |
| <b>Washing</b>              | 10 min -2 times in H <sub>2</sub> O                  |
| <b>Impregnation</b>         | Tannic Acid 1% in d H <sub>2</sub> O 30 min          |
| <b>Washing</b>              | 10 min -2 times in H <sub>2</sub> O                  |
| <b>Dehydration</b>          | None                                                 |
| <b>Drying</b>               | None                                                 |
| <b>Pt Sputter coating</b>   | Replaced by IL                                       |
| <b>Operating conditions</b> | 15-20 kV, high vacuum                                |

**Table SM4.** ID and plant name of essential oils used in the investigation.

| <b>EO ID</b> | <b>EO Name</b>         | <b>EO ID</b> | <b>EO Name</b>         |
|--------------|------------------------|--------------|------------------------|
| EO1          | Chamomile Morocco      | EO32         | Birch                  |
| EO2          | Sage Sclarea           | EO33         | Fennel                 |
| EO3          | Salvia Officinalis     | EO34         | Cedar Fruit            |
| EO4          | Red Thyme              | EO35         | Lemon                  |
| EO5          | Tea Tree Oil           | EO36         | Roman Chamomile        |
| EO6          | Melissa Oiio Essential | EO37         | Savory                 |
| EO7          | Pinus Mugo             | EO38         | Rosemary               |
| EO8          | Geranium Bourbon       | EO39         | Ceylon Cinnamon Peel   |
| EO9          | Oregano                | EO40         | Eucaliptus Globulus    |
| EO10         | Ylang Ylang            | EO41         | Sweet Orange           |
| EO11         | Coriander              | EO42         | Niaouly                |
| EO12         | Lavandula Angustifolia | EO43         | Artemisia              |
| EO13         | Myrtle                 | EO44         | Cajeput                |
| EO14         | Garlic                 | EO45         | Black Pepper           |
| EO15         | Cardamom               | EO46         | White Thyme            |
| EO16         | Mandarin               | EO47         | Marjoram               |
| EO17         | Hyssop                 | EO48         | Cloves                 |
| EO18         | Grapefruit             | EO49         | Cypress                |
| EO19         | Cymbopogon             | EO50         | Nutmeg Natural         |
| EO20         | Pinus Sibirica         | EO51         | Peppermint             |
| EO21         | Camphor                | EO52         | Verbena officinalis    |
| EO22         | Cadè                   | EO53         | Basil                  |
| EO23         | Cedar Leaves           | EO54         | Cymbopogon martinii    |
| EO24         | Ginger                 | EO55         | Laurel                 |
| EO25         | Cumin                  | EO56         | Anise                  |
| EO26         | Patchouli              | EO57         | Incense                |
| EO27         | Bitter Orange          | EO58         | Mentha Suaveolens      |
| EO28         | Eucalyptus             | EO59         | Coridothymus Capitatus |
| EO29         | Pinus Silvester        | EO60         | Thymus Vulgaris        |
| EO30         | Bergamot               | EO61         | Origanum Hirtum        |
| EO31         | Juniper                |              |                        |

**Table SM5.** Antimicrobial activity of EOs listed in Table S4. **Errore. L'origine riferimento non è stata trovata.** on representative clinical strains and reference strains of *S. aureus* [19].

| EOs ID | 6538P         | 25923         | 4S            | 5S            | 19S           |
|--------|---------------|---------------|---------------|---------------|---------------|
| 1      | Antibacterial | Antibacterial | Antibacterial | Inactive      | Inactive      |
| 2      | Inactive      | Inactive      | Inactive      | Inactive      | Inactive      |
| 3      | Inactive      | Inactive      | Inactive      | Inactive      | Inactive      |
| 4      | Antibacterial | Antibacterial | Antibacterial | Antibacterial | Antibacterial |
| 5      | Inactive      | Inactive      | Inactive      | Inactive      | Inactive      |
| 6      | Inactive      | Antibacterial | Antibacterial | Antibacterial | Antibacterial |
| 7      | Inactive      | Inactive      | Inactive      | Inactive      | Inactive      |
| 8      | Inactive      | Inactive      | Inactive      | Inactive      | Inactive      |
| 9      | Antibacterial | Antibacterial | Antibacterial | Antibacterial | Antibacterial |
| 10     | Inactive      | Inactive      | Inactive      | Inactive      | Inactive      |
| 11     | Inactive      | Inactive      | Inactive      | Inactive      | Inactive      |
| 12     | Inactive      | Inactive      | Inactive      | Inactive      | Inactive      |
| 13     | Inactive      | Inactive      | Inactive      | Inactive      | Inactive      |
| 14     | Antibacterial | Antibacterial | Antibacterial | Antibacterial | Antibacterial |
| 15     | Inactive      | Inactive      | Inactive      | Inactive      | Inactive      |
| 16     | Inactive      | Inactive      | Inactive      | Inactive      | Inactive      |
| 17     | Inactive      | Inactive      | Inactive      | Inactive      | Inactive      |
| 18     | Inactive      | Inactive      | Inactive      | Inactive      | Inactive      |
| 19     | Inactive      | Inactive      | Inactive      | Inactive      | Inactive      |
| 20     | Inactive      | Inactive      | Inactive      | Inactive      | Inactive      |
| 21     | Inactive      | Inactive      | Inactive      | Inactive      | Inactive      |
| 22     | Antibacterial | Antibacterial | Antibacterial | Antibacterial | Antibacterial |
| 23     | Inactive      | Inactive      | Inactive      | Inactive      | Inactive      |
| 24     | Inactive      | Inactive      | Inactive      | Inactive      | Inactive      |
| 25     | Inactive      | Inactive      | Inactive      | Inactive      | Inactive      |
| 26     | Inactive      | Inactive      | Inactive      | Inactive      | Inactive      |
| 27     | Inactive      | Inactive      | Inactive      | Inactive      | Inactive      |
| 28     | Inactive      | Inactive      | Inactive      | Inactive      | Inactive      |
| 29     | Inactive      | Inactive      | Inactive      | Inactive      | Inactive      |
| 30     | Inactive      | Inactive      | Inactive      | Inactive      | Inactive      |
| 31     | Inactive      | Inactive      | Inactive      | Inactive      | Inactive      |
| 32     | Antibacterial | Antibacterial | Antibacterial | Antibacterial | Antibacterial |
| 33     | Inactive      | Inactive      | Inactive      | Inactive      | Inactive      |
| 34     | Inactive      | Inactive      | Inactive      | Inactive      | Inactive      |
| 35     | Inactive      | Inactive      | Inactive      | Inactive      | Inactive      |
| 36     | Inactive      | Inactive      | Inactive      | Inactive      | Inactive      |
| 37     | Antibacterial | Antibacterial | Antibacterial | Antibacterial | Antibacterial |
| 38     | Inactive      | Inactive      | Inactive      | Inactive      | Inactive      |
| 39     | Antibacterial | Antibacterial | Antibacterial | Antibacterial | Antibacterial |
| 40     | Inactive      | Inactive      | Inactive      | Inactive      | Inactive      |
| 41     | Inactive      | Inactive      | Inactive      | Inactive      | Inactive      |
| 42     | Inactive      | Inactive      | Inactive      | Inactive      | Inactive      |
| 43     | Inactive      | Inactive      | Inactive      | Inactive      | Inactive      |
| 44     | Inactive      | Inactive      | Inactive      | Inactive      | Inactive      |
| 45     | Inactive      | Inactive      | Inactive      | Inactive      | Inactive      |
| 46     | Antibacterial | Antibacterial | Antibacterial | Antibacterial | Antibacterial |
| 47     | Inactive      | Inactive      | Inactive      | Inactive      | Inactive      |
| 48     | Antibacterial | Antibacterial | Antibacterial | Antibacterial | Antibacterial |
| 49     | Inactive      | Inactive      | Inactive      | Inactive      | Inactive      |
| 50     | Inactive      | Inactive      | Inactive      | Inactive      | Inactive      |
| 51     | Inactive      | Inactive      | Inactive      | Inactive      | Inactive      |
| 52     | Inactive      | Inactive      | Inactive      | Antibacterial | Antibacterial |
| 53     | Inactive      | Inactive      | Inactive      | Inactive      | Inactive      |
| 54     | Antibacterial | Inactive      | Inactive      | Inactive      | Antibacterial |
| 55     | Inactive      | Inactive      | Inactive      | Inactive      | Inactive      |
| 56     | Inactive      | Inactive      | Inactive      | Inactive      | Inactive      |
| 57     | Inactive      | Inactive      | Inactive      | Inactive      | Inactive      |
| 58     | Inactive      | Inactive      | Inactive      | Inactive      | Inactive      |
| 59     | Antibacterial | Antibacterial | Antibacterial | Antibacterial | Antibacterial |

|    |               |          |          |               |               |
|----|---------------|----------|----------|---------------|---------------|
| 60 | Inactive      | Inactive | Inactive | Antibacterial | Antibacterial |
| 61 | Antibacterial | Inactive | Inactive | Antibacterial | Inactive      |

---

**Table SM6.** Percentage of bacterial biofilm formation in the presence of each EO listed in Table S4 at concentration 1.00% v/v relative to untreated bacteria. Bacterial strains: *S. aureus* ATCC 6538P and *S. aureus* ATCC 25923, *S. aureus* 4S, *S. aureus* 5S and *S. aureus* 19S. Each data point is composed of 4 independent experiments, each performed with at least three replicates. The mean values are listed along with the calculated standard deviations (SD).

| EOs ID | <i>S. aureus</i> strains |       |        |       |        |       |        |       |        |       |
|--------|--------------------------|-------|--------|-------|--------|-------|--------|-------|--------|-------|
|        | 6538P                    |       | 25923  |       | 4S     |       | 5S     |       | 19S    |       |
|        | Mean                     | SD    | Mean   | SD    | Mean   | SD    | Mean   | SD    | Mean   | SD    |
| 1      | NA                       | NA    | NA     | NA    | NA     | NA    | 97.73  | 13.59 | 77.65  | 23.82 |
| 2      | 17.65                    | 8.04  | 109.52 | 18.54 | 108.40 | 28.53 | 100.49 | 11.14 | 87.76  | 12.18 |
| 3      | 5.98                     | 0.93  | 86.15  | 3.94  | 34.27  | 6.15  | 74.62  | 4.28  | 11.65  | 0.32  |
| 4      | NA                       | NA    | NA     | NA    | NA     | NA    | NA     | NA    | NA     | NA    |
| 5      | 46.75                    | 8.05  | 116.19 | 4.66  | 34.88  | 12.10 | 74.41  | 14.37 | 74.84  | 15.74 |
| 6      | 20.86                    | 1.29  | NA     | NA    | NA     | NA    | NA     | NA    | NA     | NA    |
| 7      | 27.32                    | 2.56  | 102.06 | 6.62  | 62.83  | 5.78  | 101.88 | 10.02 | 68.40  | 7.16  |
| 8      | 66.27                    | 8.13  | 64.83  | 9.79  | 81.04  | 6.94  | 120.85 | 15.29 | 67.67  | 7.40  |
| 9      | NA                       | NA    | NA     | NA    | NA     | NA    | NA     | NA    | NA     | NA    |
| 10     | 36.33                    | 5.92  | 80.39  | 5.60  | 54.27  | 14.79 | 61.74  | 8.16  | 78.10  | 21.33 |
| 11     | 5.64                     | 1.11  | 58.98  | 3.56  | 49.26  | 11.24 | 63.88  | 6.90  | 23.88  | 8.33  |
| 12     | 41.65                    | 13.47 | 98.21  | 8.46  | 70.87  | 1.31  | 69.10  | 4.08  | 82.61  | 5.72  |
| 13     | 7.15                     | 0.71  | 81.27  | 3.62  | 70.78  | 15.26 | 74.28  | 15.89 | 30.87  | 7.36  |
| 14     | NA                       | NA    | NA     | NA    | NA     | NA    | NA     | NA    | NA     | NA    |
| 15     | 16.85                    | 10.62 | 81.81  | 5.31  | 49.82  | 9.40  | 58.81  | 8.11  | 41.19  | 18.08 |
| 16     | 47.48                    | 8.77  | 217.49 | 11.25 | 52.61  | 9.15  | 91.81  | 12.97 | 75.44  | 21.36 |
| 17     | 14.36                    | 7.84  | 80.85  | 15.12 | 75.61  | 6.26  | 72.99  | 5.51  | 82.05  | 4.28  |
| 18     | 64.47                    | 3.83  | 141.11 | 19.59 | 39.23  | 5.34  | 62.52  | 11.97 | 82.69  | 14.52 |
| 19     | 35.75                    | 3.12  | 32.51  | 4.45  | 54.17  | 8.33  | 60.48  | 7.59  | 81.17  | 9.64  |
| 20     | 55.81                    | 2.55  | 211.67 | 18.55 | 57.18  | 5.82  | 91.18  | 13.41 | 114.73 | 16.47 |
| 21     | 57.92                    | 13.33 | 141.14 | 7.78  | 65.74  | 6.01  | 205.38 | 19.38 | 100.03 | 17.48 |
| 22     | NA                       | NA    | NA     | NA    | NA     | NA    | NA     | NA    | NA     | NA    |
| 23     | 168.07                   | 4.85  | 94.70  | 2.24  | 80.65  | 8.23  | 66.17  | 3.83  | 93.75  | 17.00 |
| 24     | 16.56                    | 2.71  | 72.53  | 3.06  | 36.19  | 6.34  | 31.72  | 1.88  | 53.00  | 10.41 |
| 25     | 7.56                     | 0.88  | 29.76  | 8.43  | 99.13  | 19.23 | 57.63  | 9.26  | 25.33  | 2.29  |
| 26     | 7.52                     | 0.62  | 346.73 | 6.35  | 14.97  | 1.11  | 48.41  | 1.21  | 38.46  | 7.32  |
| 27     | 13.46                    | 0.75  | 57.88  | 12.91 | 28.18  | 8.35  | 32.42  | 12.80 | 55.90  | 0.76  |
| 28     | 172.60                   | 0.40  | 76.21  | 2.15  | 106.80 | 17.54 | 78.15  | 4.99  | 108.47 | 14.10 |
| 29     | 48.04                    | 2.37  | 89.89  | 9.17  | 57.81  | 1.70  | 100.87 | 5.18  | 66.71  | 2.83  |
| 30     | 41.27                    | 8.28  | 97.98  | 16.34 | 70.67  | 16.35 | 200.34 | 22.82 | 78.20  | 8.21  |
| 31     | 69.71                    | 19.66 | 58.36  | 4.05  | 79.57  | 15.17 | 157.62 | 11.98 | 97.02  | 14.90 |
| 32     | NA                       | NA    | NA     | NA    | NA     | NA    | NA     | NA    | NA     | NA    |
| 33     | 148.88                   | 15.05 | 64.11  | 4.79  | 70.65  | 3.93  | 189.08 | 15.76 | 135.61 | 21.86 |
| 34     | 24.79                    | 5.08  | 162.31 | 15.36 | 28.14  | 7.18  | 33.96  | 5.09  | 36.67  | 3.26  |
| 35     | 48.04                    | 9.26  | 89.89  | 4.29  | 57.81  | 4.54  | 100.87 | 10.06 | 66.71  | 3.70  |
| 36     | 50.48                    | 4.74  | 157.31 | 13.26 | 30.91  | 1.86  | 38.94  | 7.99  | 40.88  | 9.48  |
| 37     | NA                       | NA    | NA     | NA    | NA     | NA    | NA     | NA    | NA     | NA    |
| 38     | 5.60                     | 1.09  | 46.71  | 20.34 | 28.68  | 11.30 | 68.31  | 15.42 | 12.83  | 3.37  |
| 39     | NA                       | NA    | NA     | NA    | NA     | NA    | NA     | NA    | NA     | NA    |
| 40     | 48.25                    | 5.73  | 119.87 | 13.19 | 65.10  | 5.60  | 17.,39 | 10.08 | 70.58  | 4.20  |
| 41     | 30.60                    | 8.35  | 61.90  | 9.02  | 89.66  | 15.45 | 36.25  | 10.47 | 119.29 | 12.75 |
| 42     | 55.30                    | 10.99 | 80.86  | 2.09  | 89.41  | 9.31  | 143.41 | 5.50  | 74.34  | 6.19  |
| 43     | 30.45                    | 6.28  | 56.99  | 5.90  | 108.71 | 14.92 | 75.51  | 2.46  | 96.23  | 14.76 |
| 44     | 45.77                    | 14.40 | 50.08  | 16.13 | 64.64  | 17.02 | 60.51  | 4.58  | 96.96  | 16.93 |
| 45     | 4.72                     | 0.69  | 36.24  | 15.21 | 34.85  | 15.73 | 32.23  | 13.35 | 17.07  | 5.52  |
| 46     | NA                       | NA    | NA     | NA    | NA     | NA    | NA     | NA    | NA     | NA    |
| 47     | 10.08                    | 1.37  | 46.59  | 14.20 | 40.78  | 19.99 | 38.46  | 15.12 | 18.04  | 3.72  |
| 48     | NA                       | NA    | NA     | NA    | NA     | NA    | NA     | NA    | NA     | NA    |
| 49     | 267.37                   | 3.58  | 31.48  | 12.65 | 79.44  | 13.07 | 101.06 | 5.93  | 143.09 | 9.16  |
| 50     | 84.44                    | 12.16 | 53.16  | 9.38  | 90.01  | 13.94 | 64.02  | 21.78 | 64.63  | 7.54  |
| 51     | 21.14                    | 12.27 | 49.12  | 6.98  | 90.36  | 18.14 | 62.49  | 8.98  | 63.16  | 5.22  |
| 52     | 16.21                    | 8.11  | 59.86  | 7.09  | 55.13  | 2.49  | NA     | NA    | NA     | NA    |
| 53     | 32.05                    | 6.30  | 36.17  | 2.71  | 61.13  | 3.99  | 42.67  | 2.42  | 69.56  | 7.91  |
| 54     | NA                       | NA    | 27.97  | 1.38  | 47.85  | 8.09  | 25.21  | 0.96  | NA     | NA    |



|               |        |       |       |       |       |       |        |       |        |       |
|---------------|--------|-------|-------|-------|-------|-------|--------|-------|--------|-------|
| 55            | 145.12 | 17.00 | 33.92 | 3.39  | 58.11 | 5.39  | 71.55  | 9.00  | 93.09  | 21.61 |
| 56            | 127.30 | 11.50 | 65.23 | 2.99  | 90.94 | 10.39 | 75.24  | 14.78 | 123.07 | 17.95 |
| 57            | 7.65   | 1.61  | 65.02 | 4.20  | 57.74 | 7.35  | 92.57  | 15.58 | 82.20  | 5.83  |
| 58            | 4.46   | 0.69  | 22.83 | 12.78 | 25.10 | 7.09  | 38.38  | 13.46 | 13.51  | 1.38  |
| 59            | NA     | NA    | NA    | NA    | NA    | NA    | NA     | NA    | NA     | NA    |
| 60            | 6.59   | 0.76  | 61.09 | 4.39  | 52.16 | 3.77  | NA     | NA    | NA     | NA    |
| 61            | NA     | NA    | 38.42 | 2.13  | 83.56 | 14.98 | NA     | NA    | 121.45 | 9.14  |
| #             | 48     |       | 49    |       | 49    |       | 47     |       | 47     | 48    |
| <b>Values</b> |        |       |       |       |       |       |        |       |        |       |
| <b>media</b>  |        |       |       |       |       |       |        |       |        |       |
| <b>n</b>      | 131.5  |       | 79.23 |       | 96.95 |       | 119.34 |       | 99.94  | 131.5 |
| <b>Media</b>  |        |       |       |       |       |       |        |       |        |       |
| <b>n Corr</b> | 31.13  |       | 65.02 |       | 65.1  |       | 74.93  |       | 82.05  | 31.13 |

**Table SM7.** Percentage of bacterial biofilm formation in the presence of each EO listed in Table S4 at concentration 0.05% v/v relative to untreated bacteria. Bacterial strains: *S. aureus* ATCC 6538P and *S. aureus* ATCC 25923, *S. aureus* 4S, *S. aureus* 5S and *S. aureus* 19S. Each data point is composed of 4 independent experiments, each performed with at least three replicates. The mean values are listed along with the calculated standard deviations (SD).

| EOs ID | <i>S. aureus</i> strains |       |        |       |        |       |        |       |        |       |
|--------|--------------------------|-------|--------|-------|--------|-------|--------|-------|--------|-------|
|        | 6538P                    |       | 25923  |       | 4S     |       | 5S     |       | 19S    |       |
|        | Mean                     | SD    | Mean   | SD    | Mean   | SD    | Mean   | SD    | Mean   | SD    |
| 1      | 135.03                   | 11.02 | 80.21  | 9.52  | 102.47 | 11.03 | 111.15 | 4.45  | 77.13  | 6.88  |
| 2      | 113.75                   | 14.12 | 97.93  | 7.03  | 105.31 | 13.17 | 110.31 | 14.98 | 89.80  | 10.10 |
| 3      | 70.40                    | 19.49 | 81.04  | 2.80  | 110.08 | 14.32 | 136.43 | 15.04 | 126.19 | 14.83 |
| 4      | 28.24                    | 3.91  | 34.89  | 2.16  | 81.10  | 2.17  | 117.42 | 17.82 | 95.52  | 15.10 |
| 5      | 59.07                    | 14.39 | 67.59  | 17.86 | 95.10  | 1.49  | 140.99 | 13.57 | 99.94  | 11.11 |
| 6      | 37.77                    | 12.45 | 74.20  | 3.22  | 81.27  | 8.09  | 126.40 | 15.52 | 95.33  | 18.47 |
| 7      | 87.94                    | 19.53 | 79.23  | 9.62  | 77.49  | 6.27  | 143.71 | 15.68 | 97.43  | 12.13 |
| 8      | 66.08                    | 13.13 | 72.43  | 8.82  | 78.73  | 4.75  | 107.67 | 11.14 | 98.57  | 19.25 |
| 9      | 18.83                    | 0.65  | 16.38  | 3.87  | 58.07  | 1.72  | 71.29  | 11.15 | 84.88  | 18.57 |
| 10     | 144.14                   | 14.55 | 86.60  | 11.64 | 86.42  | 1.47  | 90.25  | 14.19 | 82.50  | 7.32  |
| 11     | 141.67                   | 9.05  | 64.94  | 2.74  | 79.95  | 5.83  | 126.16 | 7.63  | 76.85  | 13.42 |
| 12     | 132.58                   | 9.58  | 68.17  | 4.45  | 83.30  | 1.33  | 121.08 | 6.29  | 111.25 | 14.09 |
| 13     | 98.21                    | 2.02  | 76.85  | 4.48  | 93.50  | 12.90 | 135.45 | 11.52 | 97.52  | 7.47  |
| 14     | 126.24                   | 13.22 | 51.11  | 6.95  | 95.28  | 14.29 | 144.57 | 15.18 | 106.08 | 24.37 |
| 15     | 131.50                   | 10.11 | 59.06  | 6.96  | 104.54 | 8.71  | 131.08 | 2.31  | 91.93  | 4.54  |
| 16     | 159.66                   | 5.62  | 74.07  | 20.36 | 86.79  | 3.93  | 161.38 | 12.34 | 91.74  | 9.16  |
| 17     | 113.90                   | 1.05  | 73.84  | 16.70 | 89.48  | 1.03  | 147.96 | 3.46  | 82.87  | 16.12 |
| 18     | 103.23                   | 11.41 | 61.92  | 14.20 | 74.27  | 8.90  | 171.62 | 17.51 | 85.13  | 14.70 |
| 19     | 169.86                   | 19.53 | 90.88  | 16.47 | 77.24  | 2.57  | 93.30  | 10.33 | 90.10  | 7.63  |
| 20     | 158.00                   | 20.95 | 69.83  | 14.43 | 92.21  | 11.34 | 143.89 | 10.27 | 95.57  | 4.89  |
| 21     | 171.07                   | 14.48 | 77.25  | 2.80  | 80.76  | 11.71 | 140.55 | 4.61  | 116.49 | 8.30  |
| 22     | 84.73                    | 7.49  | 95.99  | 10.66 | 84.98  | 2.54  | 133.61 | 7.27  | 159.18 | 35.47 |
| 23     | 171.77                   | 12.76 | 76.56  | 7.94  | 82.22  | 9.80  | 162.48 | 8.19  | 100.53 | 14.59 |
| 24     | 165.90                   | 12.16 | 72.29  | 15.22 | 94.10  | 6.28  | 128.64 | 19.79 | 94.47  | 3.20  |
| 25     | 150.26                   | 19.92 | 71.32  | 2.78  | 96.95  | 6.06  | 140.68 | 11.70 | 94.58  | 6.34  |
| 26     | 136.17                   | 12.17 | 79.89  | 1.58  | 82.27  | 14.13 | 101.60 | 4.06  | 137.50 | 19.22 |
| 27     | 138.63                   | 15.76 | 103.92 | 16.36 | 102.83 | 0.38  | 144.65 | 14.62 | 105.29 | 18.64 |
| 28     | 140.48                   | 16.89 | 83.31  | 9.58  | 97.12  | 13.05 | 134.48 | 17.79 | 97.23  | 11.69 |
| 29     | 148.46                   | 14.81 | 80.68  | 2.68  | 104.29 | 12.40 | 130.03 | 9.65  | 90.49  | 16.19 |
| 30     | 140.50                   | 15.82 | 85.28  | 8.93  | 115.31 | 16.19 | 122.47 | 10.01 | 112.01 | 12.93 |
| 31     | 128.06                   | 14.42 | 56.04  | 18.66 | 125.86 | 16.83 | 90.33  | 8.43  | 108.56 | 10.54 |
| 32     | 98.75                    | 10.33 | 79.98  | 9.82  | 76.00  | 2.61  | 105.70 | 13.39 | 120.50 | 19.14 |
| 33     | 137.24                   | 18.95 | 76.93  | 5.45  | 97.87  | 9.90  | 119.77 | 14.80 | 98.36  | 16.51 |
| 34     | 135.25                   | 12.55 | 76.57  | 4.70  | 93.34  | 16.50 | 127.73 | 5.18  | 95.91  | 2.92  |
| 35     | 133.13                   | 9.83  | 80.49  | 3.49  | 98.54  | 2.07  | 112.77 | 15.39 | 106.28 | 13.47 |
| 36     | 129.54                   | 13.57 | 85.70  | 3.65  | 88.63  | 10.48 | 114.68 | 2.28  | 101.05 | 13.11 |
| 37     | 26.61                    | 3.16  | 33.89  | 6.75  | 122.88 | 10.70 | 91.74  | 9.11  | 77.76  | 10.48 |
| 38     | 98.62                    | 19.73 | 116.68 | 14.38 | 91.26  | 14.85 | 107.57 | 6.29  | 148.92 | 13.50 |
| 39     | 14.45                    | 1.69  | 41.84  | 3.24  | 98.42  | 6.48  | 149.59 | 15.40 | 150.48 | 24.73 |
| 40     | 153.87                   | 18.24 | 103.74 | 4.23  | 126.13 | 28.79 | 128.35 | 16.55 | 146.65 | 19.76 |
| 41     | 182.91                   | 14.78 | 127.44 | 20.69 | 119.87 | 8.82  | 73.91  | 11.42 | 135.03 | 11.86 |

|               |        |       |        |       |        |       |        |       |        |       |
|---------------|--------|-------|--------|-------|--------|-------|--------|-------|--------|-------|
| <b>42</b>     | 177.84 | 20.39 | 105.17 | 2.23  | 122.90 | 16.76 | 110.24 | 10.13 | 145.96 | 20.05 |
| <b>43</b>     | 174.00 | 13.00 | 110.57 | 8.41  | 128.05 | 9.27  | 119.34 | 4.01  | 127.73 | 1.51  |
| <b>44</b>     | 189.15 | 24.74 | 108.57 | 3.89  | 124.22 | 18.79 | 120.79 | 15.69 | 122.34 | 14.38 |
| <b>45</b>     | 145.90 | 19.48 | 97.22  | 16.93 | 41.70  | 2.56  | 107.36 | 5.15  | 145.20 | 16.41 |
| <b>46</b>     | 25.73  | 1.69  | 34.16  | 8.41  | 128.20 | 25.48 | 85.26  | 1.41  | 84.31  | 7.72  |
| <b>47</b>     | 56.40  | 14.16 | 86.49  | 2.41  | 102.25 | 30.06 | 107.60 | 5.72  | 107.55 | 18.55 |
| <b>48</b>     | 25.00  | 1.90  | 93.20  | 5.18  | 122.70 | 15.89 | 88.74  | 9.47  | 109.67 | 15.14 |
| <b>49</b>     | 120.18 | 17.90 | 102.73 | 11.27 | 144.27 | 15.25 | 104.41 | 11.66 | 111.80 | 6.01  |
| <b>50</b>     | 124.03 | 19.29 | 156.94 | 13.36 | 123.96 | 10.85 | 96.21  | 9.63  | 120.98 | 13.59 |
| <b>51</b>     | 137.65 | 19.52 | 114.17 | 10.27 | 111.24 | 9.19  | 111.93 | 9.90  | 115.81 | 12.05 |
| <b>52</b>     | 58.72  | 12.64 | 99.47  | 7.92  | 116.11 | 11.62 | 122.86 | 11.56 | 108.43 | 13.30 |
| <b>53</b>     | 164.31 | 10.61 | 107.73 | 4.89  | 122.89 | 9.81  | 126.40 | 14.00 | 107.99 | 11.05 |
| <b>54</b>     | 164.94 | 14.00 | 135.94 | 3.80  | 34.63  | 3.03  | 86.44  | 4.76  | 118.41 | 16.60 |
| <b>55</b>     | 187.74 | 1.20  | 75.60  | 11.45 | 109.22 | 14.62 | 87.41  | 4.94  | 87.14  | 6.01  |
| <b>56</b>     | 200.70 | 18.95 | 69.44  | 3.95  | 108.19 | 13.04 | 112.60 | 5.56  | 87.13  | 5.59  |
| <b>57</b>     | 80.55  | 3.07  | 89.36  | 4.48  | 111.99 | 16.37 | 71.90  | 10.05 | 100.00 | 15.62 |
| <b>58</b>     | 90.44  | 12.94 | 76.02  | 2.07  | 120.73 | 16.97 | 175.17 | 12.19 | 91.59  | 4.81  |
| <b>59</b>     | 29.84  | 0.98  | 22.55  | 1.88  | 50.81  | 7.98  | 66.17  | 7.97  | 99.43  | 4.14  |
| <b>60</b>     | 35.99  | 3.23  | 36.93  | 3.93  | 75.54  | 7.20  | 91.75  | 11.03 | 96.80  | 9.34  |
| <b>61</b>     | 31.13  | 2.82  | 29.41  | 2.63  | 72.04  | 12.05 | 94.06  | 19.81 | 94.35  | 9.03  |
| <b>Median</b> | 131.5  |       | 79.23  |       | 96.95  |       | 119.34 |       | 99.94  | 131.5 |

**Table SM8.** Occurrences of the EOs' chemical components. Only the most frequent compounds are listed.

| <b>Component</b>       | <b>#<sup>a</sup></b> | <b>Component</b>            | <b>#<sup>a</sup></b> | <b>Component</b>        | <b>#<sup>a</sup></b> |
|------------------------|----------------------|-----------------------------|----------------------|-------------------------|----------------------|
| limonene               | 51                   | p-cymen-8-ol                | 10                   | linalyl anthranilate    | 6                    |
| $\alpha$ -pinene       | 47                   | terpinolene                 | 9                    | calamenene              | 6                    |
| $\beta$ -caryophyllene | 39                   | $\alpha$ -citral            | 9                    | $\beta$ -phellandrene   | 6                    |
| $\beta$ -myrcene       | 36                   | $\beta$ -bisabolene         | 9                    | 3-carene                | 6                    |
| linalool               | 35                   | carvacrol                   | 8                    | $\alpha$ -cadinol       | 6                    |
| eucalyptol             | 33                   | $\alpha$ -muurolene         | 8                    | spathulenol             | 6                    |
| $\beta$ -pinene        | 30                   | $\gamma$ -muurolene         | 8                    | germacrene d            | 6                    |
| o-cymene               | 29                   | carvone                     | 8                    | $\alpha$ -phellandrene  | 5                    |
| $\alpha$ -terpineol    | 28                   | bornyl acetate              | 8                    | nerol acetate           | 5                    |
| caryophyllene oxide    | 27                   | eugenol                     | 7                    | myrtenol                | 5                    |
| terpinen-4-ol          | 26                   | thymol                      | 7                    | cis- $\beta$ -farnesene | 5                    |
| sabinene               | 22                   | $\alpha$ -bergamotene       | 7                    | $\gamma$ -cadinene      | 5                    |
| $\gamma$ -terpinene    | 21                   | geranyl acetate             | 7                    | estragole               | 5                    |
| borneol                | 16                   | camphor                     | 7                    | cis- $\beta$ -terpineol | 5                    |
| humulene               | 16                   | pinocarveol                 | 7                    | cis-verbenol            | 5                    |
| $\delta$ -cadinene     | 13                   | $\alpha$ -terpinene         | 7                    | elemol                  | 4                    |
| camphene               | 13                   | $\alpha$ -terpineol acetate | 7                    | $\alpha$ -cubebene      | 4                    |
| cis-geraniol           | 12                   | 1-octen-3-ol                | 6                    | cis-carveol             | 4                    |
| p-cymene               | 11                   | $\beta$ -elemene            | 6                    | $\beta$ -citral         | 4                    |
| $\alpha$ -copaene      | 11                   | humulene epoxide 2          | 6                    | methyl thymyl ether     | 4                    |

**Table SM9.** Description of the datasets used to develop the classification models for the biofilm data.

| # <sup>a</sup> | Strain | Threshold <sup>b</sup> | A <sup>a</sup>                                |          | B                                             |          | C                                                  |          |
|----------------|--------|------------------------|-----------------------------------------------|----------|-----------------------------------------------|----------|----------------------------------------------------|----------|
|                |        |                        | Biofilm Modulation at 0.05 % v/v <sup>c</sup> |          | Biofilm Modulation at 1.00 % v/v <sup>d</sup> |          | Biofilm Modulation at 1.00 % v/v Corr <sup>e</sup> |          |
|                |        |                        | Negative                                      | Positive | Negative                                      | Positive | Negative                                           | Positive |
| 1              | 6538P  |                        | 10                                            | 51       | 26                                            | 22       | 34                                                 | 27       |
| 2              | 25923  |                        | 7                                             | 54       | 9                                             | 40       | 14                                                 | 47       |
| 3              | 4S     | 40%                    | 1                                             | 60       | 11                                            | 38       | 11                                                 | 50       |
| 4              | 5S     |                        | 0                                             | 61       | 9                                             | 38       | 9                                                  | 52       |
| 5              | 19S    |                        | 0                                             | 61       | 10                                            | 37       | 10                                                 | 51       |
| 6              | 6538P  |                        | 15                                            | 46       | 41                                            | 7        | 49                                                 | 12       |
| 7              | 25923  |                        | 33                                            | 28       | 27                                            | 22       | 36                                                 | 25       |
| 8              | 4S     | 80%                    | 12                                            | 49       | 37                                            | 12       | 40                                                 | 21       |
| 9              | 5S     |                        | 4                                             | 57       | 31                                            | 16       | 33                                                 | 28       |
| 10             | 19S    |                        | 3                                             | 58       | 28                                            | 19       | 29                                                 | 32       |
| 11             | 6538P  |                        | 22                                            | 39       | 42                                            | 6        | 52                                                 | 9        |
| 12             | 25923  |                        | 49                                            | 12       | 38                                            | 11       | 50                                                 | 11       |
| 13             | 4S     | 100%                   | 35                                            | 26       | 46                                            | 3        | 54                                                 | 7        |
| 14             | 5S     |                        | 15                                            | 46       | 35                                            | 12       | 42                                                 | 19       |
| 15             | 19S    |                        | 32                                            | 29       | 39                                            | 8        | 46                                                 | 15       |
| 16             | 6538P  |                        | 25                                            | 36       | 42                                            | 6        | 52                                                 | 9        |
| 17             | 25923  |                        | 58                                            | 3        | 42                                            | 7        | 54                                                 | 7        |
| 18             | 4S     | 120%                   | 49                                            | 12       | 49                                            | 0        | 58                                                 | 3        |
| 19             | 5S     |                        | 32                                            | 29       | 40                                            | 7        | 49                                                 | 12       |
| 20             | 19S    |                        | 48                                            | 13       | 43                                            | 4        | 54                                                 | 7        |
| 21             | 6538P  |                        | 31                                            | 30       | 24                                            | 24       | 31                                                 | 30       |
| 22             | 25923  |                        | 31                                            | 30       | 25                                            | 24       | 31                                                 | 30       |
| 23             | 4S     | median                 | 31                                            | 30       | 25                                            | 24       | 31                                                 | 30       |
| 24             | 5S     |                        | 31                                            | 30       | 24                                            | 23       | 31                                                 | 30       |
| 25             | 19S    |                        | 31                                            | 30       | 24                                            | 23       | 31                                                 | 30       |

a) dataset numbers and letters used for the dataset combination: 1A, 2A....1B, 2B....1C,2C...25C;

b) Threshold used to binarize data;

c) column indicating the number of samples showing biofilm growth modulation, negative or positive at the selected threshold at 0.05% v/v concentration;

d) column indicating the number of samples showing biofilm growth modulation, negative or positive at the selected threshold 1.00% v/v concentration;

e) column indicating the number of samples showing biofilm growth modulation, negative or positive at the selected threshold at 1.00% v/v concentration implemented with data at 0.05% v/v for missing values.

**Table SM10.** Description of the datasets used to develop the classification models for the antimicrobial data.

| # <sup>a</sup> | Strain | D <sup>b</sup> |           |
|----------------|--------|----------------|-----------|
|                |        | Actives        | Inactives |
| 1              | 6538P  | 13             | 48        |
| 2              | 25923  | 12             | 49        |
| 3              | 4S     | 12             | 49        |
| 4              | 5S     | 14             | 47        |
| 5              | 19S    | 14             | 47        |

a) dataset number used for the combination;

b) column indicating the number of samples as active or inactives.

**Table SM11.** List of hyperparameters setting used for the models' random search optimization.

| Algorithm | Parameters        | Settings                                   | Total Combinations |
|-----------|-------------------|--------------------------------------------|--------------------|
| RF        | class_weight      | list_weight                                | 133970183          |
|           | n_estimators      | from 1 to 200, step 1                      |                    |
|           | max_depth         | from 1 to 200, step 1                      |                    |
| GB        | min_samples_leaf  | from 1 to 200, step 1                      | 7880599            |
|           | n_estimators      | from 1 to 200, step 1                      |                    |
|           | max_depth         | from 1 to 200, step 1                      |                    |
| LR        | min_samples_leaf  | from 1 to 200, step 1                      | 50745              |
|           | class_weight      | list_weight                                |                    |
|           | C                 | from 1 to 200, step 1                      |                    |
|           | penalty           | l1, l2, elasticnet                         |                    |
| SV        | solver            | newton-cg, lbfgs, liblinear, sag, saga     | 13532              |
|           | max_iter          | 10000                                      |                    |
|           | class_weight      | list_weight                                |                    |
|           | C                 | from 1 to 200, step 1                      |                    |
|           | kernel            | linear, poly, rbf, sigmoid                 |                    |
|           | probability       | True                                       |                    |
| DT        | class_weight      | list_weight                                | 2176000            |
|           | criterion         | gini, entropy                              |                    |
|           | splitter          | best, random                               |                    |
|           | max_depth         | from 1 to 21, step 1                       |                    |
|           | min_samples_split | from 1 to 21, step 1                       |                    |
|           | min_samples_leaf  | from 1 to 21, step 1                       |                    |
| KNN       | max_features      | auto, sqrt, log2, None                     | 57600              |
|           | n_neighbors       | from 1 to 31, step 1                       |                    |
|           | weights           | uniform, distance                          |                    |
|           | algorithm         | auto, ball_tree, kd_tree, brute            |                    |
|           | leaf_size         | from 1 to 31, step 1                       |                    |
|           | metric            | minkowski, euclidean, manhattan, chebyshev |                    |
|           | metric_params     | None                                       |                    |
| p         | 1, 2              |                                            |                    |

**Table SM12.** Random forest models MCC and ROC AUC values.

| # <sup>a</sup> | Strain | T <sup>b</sup> | A <sup>a</sup> |                                 |      | B |                                 |      | C |                                      |      |
|----------------|--------|----------------|----------------|---------------------------------|------|---|---------------------------------|------|---|--------------------------------------|------|
|                |        |                | L <sup>f</sup> | Biofilm 0.05 % v/v <sup>c</sup> |      | L | Biofilm 1.00 % v/v <sup>d</sup> |      | L | Biofilm 1.00 % v/v Corr <sup>e</sup> |      |
|                |        |                |                | MCC                             | AUC  |   | MCC                             | AUC  |   | MCC                                  | AUC  |
| 1              | 6538P  |                | 1              | 0.67                            | 0.87 | 1 | 0.67                            | 0.87 | 2 | 0.33                                 | 0.58 |
| 2              | 25923  |                | 1              | 0.83                            | 0.92 | 1 | 0.83                            | 0.92 | 4 | 0.19                                 | 0.85 |
| 3              | 4S     | 40%            | - <sup>g</sup> | -                               | -    | - | -                               | -    | 2 | 0.27                                 | 0.49 |
| 4              | 5S     |                | -              | -                               | -    | - | -                               | -    | 1 | 0.00 <sup>h</sup>                    | 0.00 |
| 5              | 19S    |                | -              | -                               | -    | - | -                               | -    | 4 | 0.15                                 | 0.51 |
| 6              | 6538P  |                | 3              | 0.68                            | 0.82 | 3 | 0.68                            | 0.82 | 1 | 0.50                                 | 0.72 |
| 7              | 25923  |                | 4              | 0.33                            | 0.61 | 4 | 0.33                            | 0.61 | 4 | 0.38                                 | 0.62 |
| 8              | 4S     | 80%            | 1              | 0.14                            | 0.69 | 1 | 0.14                            | 0.69 | 1 | 0.00                                 | 0.00 |
| 9              | 5S     |                | -              | -                               | -    | - | -                               | -    | 2 | 0.19                                 | 0.36 |
| 10             | 19S    |                | -              | -                               | -    | - | -                               | -    | 1 | 0.18                                 | 0.27 |
| 11             | 6538P  |                | 4              | 0.53                            | 0.78 | 4 | 0.53                            | 0.78 | 1 | 0.55                                 | 0.62 |
| 12             | 25923  |                | 1              | 0.26                            | 0.50 | 1 | 0.26                            | 0.50 | 1 | 0.20                                 | 0.59 |
| 13             | 4S     | 100%           | 3              | 0.16                            | 0.51 | 3 | 0.16                            | 0.51 | - | -                                    | -    |
| 14             | 5S     |                | 1              | 0.46                            | 0.66 | 1 | 0.46                            | 0.66 | 2 | 0.12                                 | 0.47 |
| 15             | 19S    |                | 2              | 0.41                            | 0.72 | 2 | 0.41                            | 0.72 | 1 | 0.33                                 | 0.56 |
| 16             | 6538P  |                | 1              | 0.37                            | 0.69 | 1 | 0.37                            | 0.69 | 1 | 0.55                                 | 0.65 |
| 17             | 25923  |                | -              | -                               | -    | - | -                               | -    | 1 | 0.00                                 | 0.00 |
| 18             | 4S     | 120%           | 1              | 0.26                            | 0.39 | 1 | 0.26                            | 0.39 | - | -                                    | -    |
| 19             | 5S     |                | 3              | 0.10                            | 0.39 | 3 | 0.10                            | 0.39 | 1 | 0.00                                 | 0.00 |
| 20             | 19S    |                | 3              | 0.25                            | 0.65 | 3 | 0.25                            | 0.65 | - | -                                    | -    |
| 21             | 6538P  |                | 2              | 0.32                            | 0.66 | 2 | 0.32                            | 0.66 | 1 | 0.17                                 | 0.55 |
| 22             | 25923  |                | 4              | 0.44                            | 0.61 | 4 | 0.44                            | 0.61 | 4 | 0.32                                 | 0.70 |
| 23             | 4S     | median         | 1              | 0.19                            | 0.62 | 1 | 0.19                            | 0.62 | 2 | 0.14                                 | 0.49 |
| 24             | 5S     |                | 3              | 0.29                            | 0.45 | 3 | 0.29                            | 0.45 | 1 | 0.13                                 | 0.49 |
| 25             | 19S    |                | 2              | 0.28                            | 0.68 | 2 | 0.28                            | 0.68 | 1 | 0.00                                 | 0.00 |

a) dataset numbers and letters used for the dataset combination: 1A, 2A....1B, 2B....1C,2C...25C;

b) Threshold used to binarize data;

c) column indicating the MCC and ROC AUC values for datasets compiled with biofilm formation at 0.05% v/v concentration;

d) column indicating the MCC and ROC AUC values for datasets compiled with biofilm formation at 1.00% v/v concentration;

e) column indicating the MCC and ROC AUC values for datasets compiled with biofilm formation at 1.00% v/v concentration implemented with data at 0.05% v/v for missing values.

f) optimal nlevel value

g) a dash indicates too unbalanced dataset and no model was elaborated

h) 0.00 indicates the model was characterized with MCC negative values

**Table SM13.** Gradient boosting models MCC and ROC AUC values.

| # <sup>a</sup> | Strain | T <sup>b</sup> | A <sup>a</sup> |                                 |      | B                               |      |      | C                                    |                   |      |
|----------------|--------|----------------|----------------|---------------------------------|------|---------------------------------|------|------|--------------------------------------|-------------------|------|
|                |        |                | L <sup>f</sup> | Biofilm 0.05 % v/v <sup>c</sup> |      | Biofilm 1.00 % v/v <sup>d</sup> |      |      | Biofilm 1.00 % v/v Corr <sup>e</sup> |                   |      |
|                |        |                |                | MCC                             | AUC  | L                               | MCC  | AUC  | L                                    | MCC               | AUC  |
| 1              | 6538P  |                | 4              | 0.88                            | 0.93 | 4                               | 0.88 | 0.93 | 1                                    | 0.24              | 0.66 |
| 2              | 25923  |                | 1              | 1.00                            | 1.00 | 1                               | 1.00 | 1.00 | 4                                    | 0.22              | 0.76 |
| 3              | 4S     | 40%            | - <sup>g</sup> | -                               | -    | -                               | -    | -    | 2                                    | 0.07              | 0.63 |
| 4              | 5S     |                | -              | -                               | -    | -                               | -    | -    | 3                                    | 0.25              | 0.67 |
| 5              | 19S    |                | -              | -                               | -    | -                               | -    | -    | 1                                    | 0.15              | 0.69 |
| 6              | 6538P  |                | 2              | 0.75                            | 0.89 | 2                               | 0.75 | 0.89 | 1                                    | 0.52              | 0.81 |
| 7              | 25923  |                | 2              | 0.35                            | 0.69 | 2                               | 0.35 | 0.69 | 1                                    | 0.29              | 0.60 |
| 8              | 4S     | 80%            | 4              | 0.25                            | 0.64 | 4                               | 0.25 | 0.64 | 1                                    | 0.00 <sup>h</sup> | 0.00 |
| 9              | 5S     |                | -              | -                               | -    | -                               | -    | -    | 4                                    | 0.36              | 0.72 |
| 10             | 19S    |                | -              | -                               | -    | -                               | -    | -    | 2                                    | 0.32              | 0.58 |
| 11             | 6538P  |                | 1              | 0.53                            | 0.84 | 1                               | 0.53 | 0.84 | 1                                    | 0.57              | 0.68 |
| 12             | 25923  |                | 2              | 0.48                            | 0.77 | 2                               | 0.48 | 0.77 | 1                                    | 0.41              | 0.61 |
| 13             | 4S     | 100%           | 2              | 0.32                            | 0.59 | 2                               | 0.32 | 0.59 | -                                    | -                 | -    |
| 14             | 5S     |                | 4              | 0.63                            | 0.71 | 4                               | 0.63 | 0.71 | 4                                    | 0.11              | 0.66 |
| 15             | 19S    |                | 1              | 0.38                            | 0.67 | 1                               | 0.38 | 0.67 | 3                                    | 0.58              | 0.82 |
| 16             | 6538P  |                | 3              | 0.45                            | 0.72 | 3                               | 0.45 | 0.72 | 1                                    | 0.34              | 0.63 |
| 17             | 25923  |                | -              | -                               | -    | -                               | -    | -    | 4                                    | 0.21              | 0.39 |
| 18             | 4S     | 120%           | 3              | 0.15                            | 0.32 | 3                               | 0.15 | 0.32 | -                                    | -                 | -    |
| 19             | 5S     |                | 1              | 0.00                            | 0.00 | 1                               | 0.00 | 0.00 | 1                                    | 0.30              | 0.44 |
| 20             | 19S    |                | 4              | 0.45                            | 0.67 | 4                               | 0.45 | 0.67 | -                                    | -                 | -    |
| 21             | 6538P  |                | 2              | 0.32                            | 0.69 | 2                               | 0.32 | 0.69 | 4                                    | 0.13              | 0.51 |
| 22             | 25923  |                | 2              | 0.18                            | 0.64 | 2                               | 0.18 | 0.64 | 1                                    | 0.31              | 0.66 |
| 23             | 4S     | median         | 1              | 0.55                            | 0.73 | 1                               | 0.55 | 0.73 | 2                                    | 0.18              | 0.54 |
| 24             | 5S     |                | 1              | 0.00                            | 0.00 | 1                               | 0.00 | 0.00 | 1                                    | 0.28              | 0.61 |
| 25             | 19S    |                | 2              | 0.38                            | 0.72 | 2                               | 0.38 | 0.72 | 1                                    | 0.00              | 0.00 |

a) dataset numbers and letters used for the dataset combination: 1A, 2A....1B, 2B....1C,2C...25C;

b) Threshold used to binarize data;

c) column indicating the MCC and ROC AUC values for datasets compiled with biofilm formation at 0.05% v/v concentration;

d) column indicating the MCC and ROC AUC values for datasets compiled with biofilm formation at 1.00% v/v concentration;

e) column indicating the MCC and ROC AUC values for datasets compiled with biofilm formation at 1.00% v/v concentration implemented with data at 0.05% v/v for missing values.

f) optimal nlevel value

g) a dash indicates too unbalanced dataset and no model was elaborated

h) 0.00 indicates the model was characterized with MCC negative values



**Table SM14.** Logistic regression models MCC and ROC AUC values.

| # <sup>a</sup> | Strain | T <sup>b</sup> | A <sup>a</sup> |                                 |      | B |                                 |      | C |                                      |      |
|----------------|--------|----------------|----------------|---------------------------------|------|---|---------------------------------|------|---|--------------------------------------|------|
|                |        |                | L <sup>f</sup> | Biofilm 0.05 % v/v <sup>c</sup> |      | L | Biofilm 1.00 % v/v <sup>d</sup> |      | L | Biofilm 1.00 % v/v Corr <sup>e</sup> |      |
|                |        |                |                | MCC                             | AUC  |   | MCC                             | AUC  |   | MCC                                  | AUC  |
| 1              | 6538P  |                | 1              | 0.83                            | 0.97 | 1 | 0.83                            | 0.97 | 1 | 0.28                                 | 0.65 |
| 2              | 25923  |                | 3              | 1.00                            | 1.00 | 3 | 1.00                            | 1.00 | 4 | 0.14                                 | 0.58 |
| 3              | 4S     | 40%            | - <sup>g</sup> | -                               | -    | - | -                               | -    | 2 | 0.09                                 | 0.52 |
| 4              | 5S     |                | -              | -                               | -    | - | -                               | -    | 1 | 0.13                                 | 0.58 |
| 5              | 19S    |                | -              | -                               | -    | - | -                               | -    | 1 | 0.00 <sup>h</sup>                    | 0.00 |
| 6              | 6538P  |                | 2              | 0.73                            | 0.91 | 2 | 0.73                            | 0.91 | 1 | 0.73                                 | 0.84 |
| 7              | 25923  |                | 4              | 0.18                            | 0.42 | 4 | 0.18                            | 0.42 | 4 | 0.33                                 | 0.65 |
| 8              | 4S     | 80%            | 1              | 0.36                            | 0.71 | 1 | 0.36                            | 0.71 | 4 | 0.06                                 | 0.52 |
| 9              | 5S     |                | -              | -                               | -    | - | -                               | -    | 4 | 0.26                                 | 0.45 |
| 10             | 19S    |                | -              | -                               | -    | - | -                               | -    | 1 | 0.26                                 | 0.45 |
| 11             | 6538P  |                | 2              | 0.52                            | 0.77 | 2 | 0.52                            | 0.77 | 1 | 0.43                                 | 0.84 |
| 12             | 25923  |                | 1              | 0.27                            | 0.65 | 1 | 0.27                            | 0.65 | 1 | 0.38                                 | 0.68 |
| 13             | 4S     | 100%           | 4              | 0.06                            | 0.50 | 4 | 0.06                            | 0.50 | - | -                                    | -    |
| 14             | 5S     |                | 4              | 0.57                            | 0.70 | 4 | 0.57                            | 0.70 | 2 | 0.25                                 | 0.49 |
| 15             | 19S    |                | 3              | 0.46                            | 0.69 | 3 | 0.46                            | 0.69 | 1 | 0.33                                 | 0.51 |
| 16             | 6538P  |                | 2              | 0.41                            | 0.61 | 2 | 0.41                            | 0.61 | 1 | 0.43                                 | 0.86 |
| 17             | 25923  |                | -              | -                               | -    | - | -                               | -    | 1 | 0.35                                 | 0.54 |
| 18             | 4S     | 120%           | 1              | 0.08                            | 0.44 | 1 | 0.08                            | 0.44 | - | -                                    | -    |
| 19             | 5S     |                | 4              | 0.18                            | 0.44 | 4 | 0.18                            | 0.44 | 1 | 0.28                                 | 0.55 |
| 20             | 19S    |                | 2              | 0.50                            | 0.78 | 2 | 0.50                            | 0.78 | - | -                                    | -    |
| 21             | 6538P  |                | 2              | 0.28                            | 0.66 | 2 | 0.28                            | 0.66 | 4 | 0.35                                 | 0.57 |
| 22             | 25923  |                | 3              | 0.27                            | 0.48 | 3 | 0.27                            | 0.48 | 1 | 0.36                                 | 0.74 |
| 23             | 4S     | median         | 4              | 0.20                            | 0.59 | 4 | 0.20                            | 0.59 | 1 | 0.11                                 | 0.48 |
| 24             | 5S     |                | 3              | 0.35                            | 0.47 | 3 | 0.35                            | 0.47 | 2 | 0.20                                 | 0.54 |
| 25             | 19S    |                | 2              | 0.35                            | 0.65 | 2 | 0.35                            | 0.65 | 1 | 0.06                                 | 0.47 |

a) dataset numbers and letters used for the dataset combination: 1A, 2A....1B, 2B....1C,2C...25C;

b) Threshold used to binarize data;

c) column indicating the MCC and ROC AUC values for datasets compiled with biofilm formation at 0.05% v/v concentration;

d) column indicating the MCC and ROC AUC values for datasets compiled with biofilm formation at 1.00% v/v concentration;

e) column indicating the MCC and ROC AUC values for datasets compiled with biofilm formation at 1.00% v/v concentration implemented with data at 0.05% v/v for missing values.

f) optimal nlevel value

g) a dash indicates too unbalanced dataset and no model was elaborated

h) 0.00 indicates the model was characterized with MCC negative values

**Table SM15.** Support vector machine models MCC and ROC AUC values.

| # <sup>a</sup> | Strain | T <sup>b</sup> | A <sup>a</sup> |                                 |      | B                               |      |      | C                                    |      |      |
|----------------|--------|----------------|----------------|---------------------------------|------|---------------------------------|------|------|--------------------------------------|------|------|
|                |        |                | L <sup>f</sup> | Biofilm 0.05 % v/v <sup>c</sup> |      | Biofilm 1.00 % v/v <sup>d</sup> |      |      | Biofilm 1.00 % v/v Corr <sup>e</sup> |      |      |
|                |        |                |                | MCC                             | AUC  | L                               | MCC  | AUC  | L                                    | MCC  | AUC  |
| 1              | 6538P  |                | 2              | 0.94                            | 0.98 | 2                               | 0.94 | 0.98 | 2                                    | 0.33 | 0.25 |
| 2              | 25923  |                | 1              | 1.00                            | 1.00 | 1                               | 1.00 | 1.00 | 3                                    | 0.05 | 0.17 |
| 3              | 4S     | 40%            | - <sup>g</sup> | -                               | -    | -                               | -    | -    | 3                                    | 0.33 | 0.51 |
| 4              | 5S     |                | -              | -                               | -    | -                               | -    | -    | 1                                    | 0.24 | 0.00 |
| 5              | 19S    |                | -              | -                               | -    | -                               | -    | -    | 4                                    | 0.28 | 0.43 |
| 6              | 6538P  |                | 1              | 0.82                            | 0.90 | 1                               | 0.82 | 0.90 | 1                                    | 0.63 | 0.80 |
| 7              | 25923  |                | 2              | 0.34                            | 0.60 | 2                               | 0.34 | 0.60 | 4                                    | 0.25 | 0.55 |
| 8              | 4S     | 80%            | 4              | 0.39                            | 0.67 | 4                               | 0.39 | 0.67 | 4                                    | 0.18 | 0.13 |
| 9              | 5S     |                | -              | -                               | -    | -                               | -    | -    | 3                                    | 0.33 | 0.35 |
| 10             | 19S    |                | -              | -                               | -    | -                               | -    | -    | 4                                    | 0.23 | 0.06 |
| 11             | 6538P  |                | 3              | 0.64                            | 0.76 | 3                               | 0.64 | 0.76 | 1                                    | 0.57 | 0.63 |
| 12             | 25923  |                | 2              | 0.48                            | 0.62 | 2                               | 0.48 | 0.62 | 4                                    | 0.27 | 0.33 |
| 13             | 4S     | 100%           | 2              | 0.09                            | 0.10 | 2                               | 0.09 | 0.10 | -                                    | -    | -    |
| 14             | 5S     |                | 3              | 0.63                            | 0.58 | 3                               | 0.63 | 0.58 | 1                                    | 0.31 | 0.28 |
| 15             | 19S    |                | 4              | 0.27                            | 0.24 | 4                               | 0.27 | 0.24 | 1                                    | 0.47 | 0.03 |
| 16             | 6538P  |                | 3              | 0.52                            | 0.76 | 3                               | 0.52 | 0.76 | 1                                    | 0.57 | 0.54 |
| 17             | 25923  |                | -              | -                               | -    | -                               | -    | -    | 1                                    | 0.09 | 0.22 |
| 18             | 4S     | 120%           | 3              | 0.24                            | 0.22 | 3                               | 0.24 | 0.22 | -                                    | -    | -    |
| 19             | 5S     |                | 2              | 0.21                            | 0.39 | 2                               | 0.21 | 0.39 | 3                                    | 0.33 | 0.48 |
| 20             | 19S    |                | 4              | 0.46                            | 0.49 | 4                               | 0.46 | 0.49 | -                                    | -    | -    |
| 21             | 6538P  |                | 3              | 0.48                            | 0.66 | 3                               | 0.48 | 0.66 | 2                                    | 0.30 | 0.35 |
| 22             | 25923  |                | 2              | 0.35                            | 0.38 | 2                               | 0.35 | 0.38 | 4                                    | 0.34 | 0.51 |
| 23             | 4S     | median         | 3              | 0.25                            | 0.55 | 3                               | 0.25 | 0.55 | 2                                    | 0.24 | 0.21 |
| 24             | 5S     |                | 3              | 0.26                            | 0.44 | 3                               | 0.26 | 0.44 | 4                                    | 0.25 | 0.45 |
| 25             | 19S    |                | 4              | 0.32                            | 0.39 | 4                               | 0.32 | 0.39 | 1                                    | 0.15 | 0.42 |

a) dataset numbers and letters used for the dataset combination: 1A, 2A....1B, 2B....1C,2C...25C;

b) Threshold used to binarize data;

c) column indicating the MCC and ROC AUC values for datasets compiled with biofilm formation at 0.05% v/v concentration;

d) column indicating the MCC and ROC AUC values for datasets compiled with biofilm formation at 1.00% v/v concentration;

e) column indicating the MCC and ROC AUC values for datasets compiled with biofilm formation at 1.00% v/v concentration implemented with data at 0.05% v/v for missing values.

f) optimal nlevel value

g) a dash indicates too unbalanced dataset and no model was elaborated

**Table SM16.** Decision trees models MCC and ROC AUC values.

| # <sup>a</sup> | Strain | T <sup>b</sup> | A <sup>a</sup> |                                 |      | B                               |      |      | C                                    |      |      |
|----------------|--------|----------------|----------------|---------------------------------|------|---------------------------------|------|------|--------------------------------------|------|------|
|                |        |                | L <sup>f</sup> | Biofilm 0.05 % v/v <sup>c</sup> |      | Biofilm 1.00 % v/v <sup>d</sup> |      |      | Biofilm 1.00 % v/v Corr <sup>e</sup> |      |      |
|                |        |                |                | MCC                             | AUC  | L                               | MCC  | AUC  | L                                    | MCC  | AUC  |
| 1              | 6538P  |                | 2              | 0.83                            | 0.92 | 2                               | 0.83 | 0.92 | 4                                    | 0.42 | 0.41 |
| 2              | 25923  |                | 2              | 0.93                            | 0.98 | 2                               | 0.93 | 0.98 | 4                                    | 0.54 | 0.69 |
| 3              | 4S     | 40%            | - <sup>g</sup> | -                               | -    | -                               | -    | -    | 2                                    | 0.38 | 0.48 |
| 4              | 5S     |                | -              | -                               | -    | -                               | -    | -    | 3                                    | 0.42 | 0.65 |
| 5              | 19S    |                | -              | -                               | -    | -                               | -    | -    | 4                                    | 0.31 | 0.55 |
| 6              | 6538P  |                | 2              | 0.80                            | 0.89 | 2                               | 0.80 | 0.89 | 2                                    | 0.62 | 0.77 |
| 7              | 25923  |                | 4              | 0.61                            | 0.78 | 4                               | 0.61 | 0.78 | 4                                    | 0.52 | 0.77 |
| 8              | 4S     | 80%            | 1              | 0.44                            | 0.62 | 1                               | 0.44 | 0.62 | 2                                    | 0.05 | 0.36 |
| 9              | 5S     |                | -              | -                               | -    | -                               | -    | -    | 4                                    | 0.47 | 0.50 |
| 10             | 19S    |                | -              | -                               | -    | -                               | -    | -    | 2                                    | 0.42 | 0.64 |
| 11             | 6538P  |                | 2              | 0.60                            | 0.79 | 2                               | 0.60 | 0.79 | 4                                    | 0.57 | 0.84 |
| 12             | 25923  |                | 1              | 0.39                            | 0.62 | 1                               | 0.39 | 0.62 | 1                                    | 0.55 | 0.37 |
| 13             | 4S     | 100%           | 2              | 0.24                            | 0.50 | 2                               | 0.24 | 0.50 | -                                    | -    | -    |
| 14             | 5S     |                | 4              | 0.68                            | 0.74 | 4                               | 0.68 | 0.74 | 4                                    | 0.45 | 0.56 |
| 15             | 19S    |                | 1              | 0.44                            | 0.67 | 1                               | 0.44 | 0.67 | 3                                    | 0.61 | 0.80 |
| 16             | 6538P  |                | 4              | 0.51                            | 0.46 | 4                               | 0.51 | 0.46 | 4                                    | 0.74 | 0.83 |
| 17             | 25923  |                | -              | -                               | -    | -                               | -    | -    | 1                                    | 0.38 | 0.41 |
| 18             | 4S     | 120%           | 2              | 0.11                            | 0.48 | 2                               | 0.11 | 0.48 | -                                    | -    | -    |
| 19             | 5S     |                | 3              | 0.36                            | 0.48 | 3                               | 0.36 | 0.48 | 2                                    | 0.35 | 0.35 |
| 20             | 19S    |                | 3              | 0.41                            | 0.72 | 3                               | 0.41 | 0.72 | -                                    | -    | -    |
| 21             | 6538P  |                | 1              | 0.36                            | 0.56 | 1                               | 0.36 | 0.56 | 4                                    | 0.37 | 0.45 |
| 22             | 25923  |                | 1              | 0.29                            | 0.53 | 1                               | 0.29 | 0.53 | 1                                    | 0.51 | 0.61 |
| 23             | 4S     | median         | 1              | 0.55                            | 0.76 | 1                               | 0.55 | 0.76 | 2                                    | 0.39 | 0.54 |
| 24             | 5S     |                | 3              | 0.38                            | 0.41 | 3                               | 0.38 | 0.41 | 2                                    | 0.36 | 0.56 |
| 25             | 19S    |                | 2              | 0.43                            | 0.73 | 2                               | 0.43 | 0.73 | 4                                    | 0.08 | 0.38 |

a) dataset numbers and letters used for the dataset combination: 1A, 2A....1B, 2B....1C,2C...25C;

b) Threshold used to binarize data;

c) column indicating the MCC and ROC AUC values for datasets compiled with biofilm formation at 0.05% v/v concentration;

d) column indicating the MCC and ROC AUC values for datasets compiled with biofilm formation at 1.00% v/v concentration;

e) column indicating the MCC and ROC AUC values for datasets compiled with biofilm formation at 1.00% v/v concentration implemented with data at 0.05% v/v for missing values.

f) optimal nlevel value

g) a dash indicates too unbalanced dataset and no model was elaborated

**Table SM17.** KNN models MCC and ROC AUC values.

| # <sup>a</sup> | Strain | T <sup>b</sup> | A <sup>a</sup> |                                 |      | B                               |      |      | C                                    |      |      |
|----------------|--------|----------------|----------------|---------------------------------|------|---------------------------------|------|------|--------------------------------------|------|------|
|                |        |                | L <sup>f</sup> | Biofilm 0.05 % v/v <sup>c</sup> |      | Biofilm 1.00 % v/v <sup>d</sup> |      |      | Biofilm 1.00 % v/v Corr <sup>e</sup> |      |      |
|                |        |                |                | MCC                             | AUC  | L                               | MCC  | AUC  | L                                    | MCC  | AUC  |
| 1              | 6538P  |                | 4              | 0.88                            | 0.93 | 4                               | 0.88 | 0.93 | 3                                    | 0.41 | 0.70 |
| 2              | 25923  |                | 1              | 1.00                            | 1.00 | 1                               | 1.00 | 1.00 | 4                                    | 0.26 | 0.62 |
| 3              | 4S     | 40%            | -              | -                               | -    | -                               | -    | -    | 1                                    | 0.38 | 0.39 |
| 4              | 5S     |                | -              | -                               | -    | -                               | -    | -    | 4                                    | 0.18 | 0.57 |
| 5              | 19S    |                | -              | -                               | -    | -                               | -    | -    | 4                                    | 0.29 | 0.70 |
| 6              | 6538P  |                | 1              | 0.77                            | 0.88 | 1                               | 0.77 | 0.88 | 1                                    | 0.29 | 0.71 |
| 7              | 25923  |                | 3              | 0.27                            | 0.58 | 3                               | 0.27 | 0.58 | 3                                    | 0.13 | 0.58 |
| 8              | 4S     | 80%            | 1              | 0.39                            | 0.76 | 1                               | 0.39 | 0.76 | 1                                    | 0.17 | 0.52 |
| 9              | 5S     |                | -              | -                               | -    | -                               | -    | -    | 3                                    | 0.11 | 0.39 |
| 10             | 19S    |                | -              | -                               | -    | -                               | -    | -    | 1                                    | 0.16 | 0.39 |
| 11             | 6538P  |                | 1              | 0.61                            | 0.79 | 1                               | 0.61 | 0.79 | 1                                    | 0.39 | 0.54 |
| 12             | 25923  |                | 2              | 0.42                            | 0.68 | 2                               | 0.42 | 0.68 | 1                                    | 0.10 | 0.49 |
| 13             | 4S     | 100%           | 3              | 0.23                            | 0.40 | 3                               | 0.23 | 0.40 | -                                    | -    | -    |
| 14             | 5S     |                | 4              | 0.52                            | 0.77 | 4                               | 0.52 | 0.77 | 3                                    | 0.23 | 0.62 |
| 15             | 19S    |                | 3              | 0.39                            | 0.62 | 3                               | 0.39 | 0.62 | 1                                    | 0.25 | 0.55 |
| 16             | 6538P  |                | 1              | 0.59                            | 0.76 | 1                               | 0.59 | 0.76 | 1                                    | 0.39 | 0.58 |
| 17             | 25923  |                | -              | -                               | -    | -                               | -    | -    | 1                                    | 0.21 | 0.53 |
| 18             | 4S     | 120%           | 2              | 0.27                            | 0.35 | 2                               | 0.27 | 0.35 | -                                    | -    | -    |
| 19             | 5S     |                | 2              | 0.31                            | 0.56 | 2                               | 0.31 | 0.56 | 1                                    | 0.20 | 0.57 |
| 20             | 19S    |                | 2              | 0.37                            | 0.67 | 2                               | 0.37 | 0.67 | -                                    | -    | -    |
| 21             | 6538P  |                | 1              | 0.44                            | 0.68 | 1                               | 0.44 | 0.68 | 3                                    | 0.38 | 0.64 |
| 22             | 25923  |                | 1              | 0.21                            | 0.57 | 1                               | 0.21 | 0.57 | 3                                    | 0.31 | 0.56 |
| 23             | 4S     | median         | 3              | 0.31                            | 0.56 | 3                               | 0.31 | 0.56 | 4                                    | 0.20 | 0.40 |
| 24             | 5S     |                | 2              | 0.35                            | 0.52 | 2                               | 0.35 | 0.52 | 2                                    | 0.28 | 0.64 |
| 25             | 19S    |                | 3              | 0.35                            | 0.56 | 3                               | 0.35 | 0.56 | 1                                    | 0.00 | 0.00 |

a) dataset numbers and letters used for the dataset combination: 1A, 2A....1B, 2B....1C,2C...25C;

b) Threshold used to binarize data;

c) column indicating the MCC and ROC AUC values for datasets compiled with biofilm formation at 0.05% v/v concentration;

d) column indicating the MCC and ROC AUC values for datasets compiled with biofilm formation at 1.00% v/v concentration;

e) column indicating the MCC and ROC AUC values for datasets compiled with biofilm formation at 1.00% v/v concentration implemented with data at 0.05% v/v for missing values.

f) optimal nlevel value

g) a dash indicates too unbalanced dataset and no model was elaborated

**Table SM18.** RF, GB, LR, SV, DT and KNN ML learning algorithms MCC and ROC AUC values for the antimicrobial dataset.

| # <sup>a</sup> | Strain <sup>b</sup> | RF <sup>c</sup> |                  | GB <sup>c</sup>  |   | LR <sup>c</sup> |      | SV <sup>c</sup> |      | DT <sup>c</sup> |   | KNN <sup>c</sup> |      |   |      |      |   |      |      |
|----------------|---------------------|-----------------|------------------|------------------|---|-----------------|------|-----------------|------|-----------------|---|------------------|------|---|------|------|---|------|------|
|                |                     | L <sup>d</sup>  | MCC <sup>e</sup> | AUC <sup>f</sup> | L | MCC             | AUC  | L               | MCC  | AUC             | L | MCC              | AUC  | L | MCC  | AUC  |   |      |      |
| <b>1D</b>      | 6538P               | 1               | 0.44             | 0.80             | 4 | 0.57            | 0.86 | 1               | 0.44 | 0.80            | 4 | 0.69             | 0.85 | 1 | 0.63 | 0.88 | 3 | 0.65 | 0.84 |
| <b>2D</b>      | 25923               | 1               | 0.46             | 0.82             | 2 | 0.54            | 0.82 | 1               | 0.46 | 0.82            | 4 | 0.72             | 0.86 | 3 | 0.60 | 0.82 | 2 | 0.63 | 0.86 |
| <b>3D</b>      | 4S                  | 4               | 0.47             | 0.80             | 2 | 0.54            | 0.84 | 4               | 0.47 | 0.80            | 4 | 0.72             | 0.87 | 3 | 0.66 | 0.80 | 2 | 0.67 | 0.87 |
| <b>4D</b>      | 5S                  | 4               | 0.71             | 0.89             | 4 | 0.76            | 0.87 | 4               | 0.71 | 0.89            | 2 | 0.95             | 0.99 | 2 | 0.71 | 0.83 | 2 | 0.87 | 0.93 |
| <b>5D</b>      | 19S                 | 4               | 0.65             | 0.85             | 3 | 0.71            | 0.77 | 4               | 0.65 | 0.85            | 4 | 0.81             | 0.93 | 2 | 0.71 | 0.87 | 2 | 0.76 | 0.91 |

a) Dataset combination defined similarly as from tables 12-17; b) *S aureus* strain code; c) Machine learning algorithm as defined in Material and Methods; ; d) Matthew correlation coefficient; e) ROC AUC values.

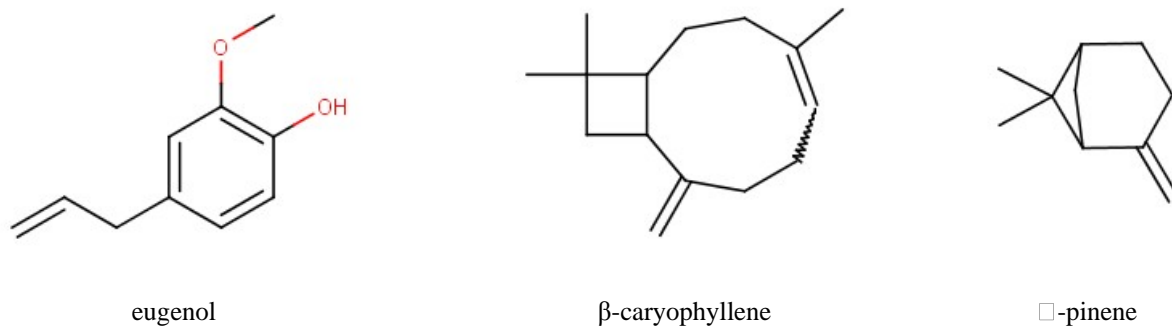

**Figure SM1.** Chemical structure of compounds mostly predicted as reducer of biofilm production (main text Table 3).

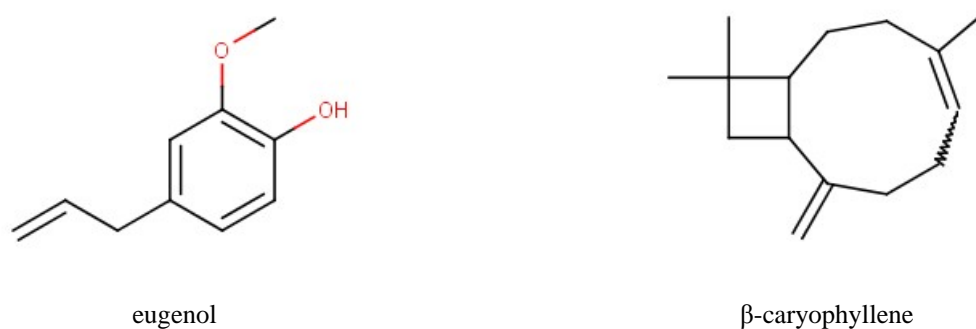

**Figure SM2.** Chemical structure of compounds predicted to have both ability to reduce biofilm production and as antibacterial (main text Table 3).

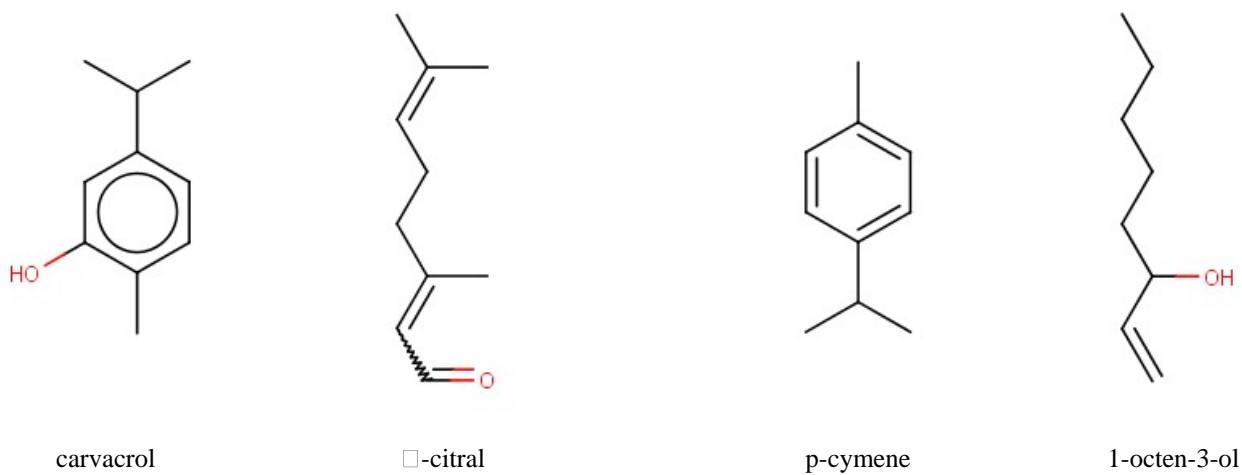

**Figure SM3.** Chemical structure of compounds predicted to increase antibacterial potency (main text Table 3).

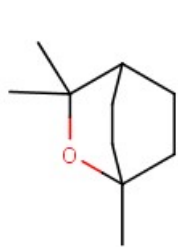

eucalyptol

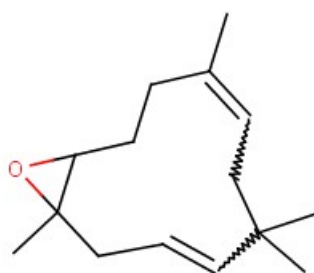

humulene epoxide 2

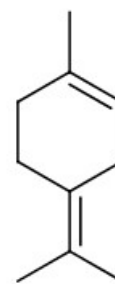

terpinolene

**Figure SM4.** Example of chemical structure of compounds predicted to have the ability to likely modulate the inducing of biofilm production or counteracting biofilm inhibition (main text Table 3).

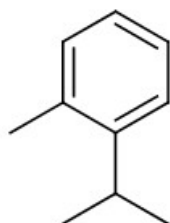

o-cymene

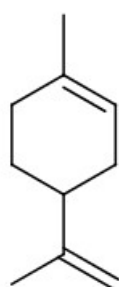

limonene

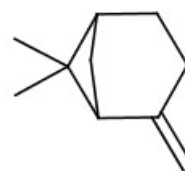

$\alpha$ -pinene

**Figure SM5.** Chemical structure of compounds predicted not to have fixed behavior on different *S. aureus* bacterial strains (main text Table 3).

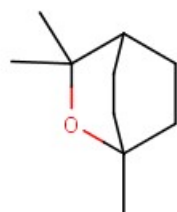

eucalyptol

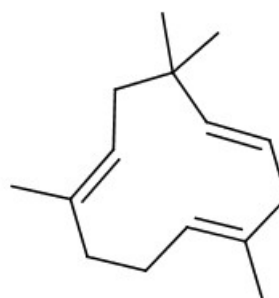

humulene

**Figure SM6.** Chemical structure of compounds predicted to have ability to induce biofilm production and antisynnergistic antibacterial activity (main text Table 3).

**Table SM18.** Compositions of the 61 essential oils used in the study

|                                      | EO1  |
|--------------------------------------|------|
| . $\tau$ -muurolol                   | 2.1  |
| artemisia alcohol                    | 1.3  |
| borneol                              | 1.2  |
| borneol, butyrate                    | 4.3  |
| $\beta$ -caryophyllene               | 1.0  |
| caryophyllene oxide                  | 1.3  |
| cis-3-pinane                         | 0.3  |
| cis- $\beta$ -farnesene              | 5.2  |
| eucalyptol                           | 2.0  |
| germacrene d                         | 4.5  |
| isobornyl 3-methylbutanoate          | 3.1  |
| limonene                             | 6.7  |
| linalool                             | 0.3  |
| myrtenol                             | 0.4  |
| $\alpha$ -cymene                     | 0.2  |
| pinocarveol                          | 7.4  |
| sativene                             | 0.9  |
| spathulenol                          | 4.0  |
| terpinen-4-ol                        | 0.4  |
| trans-2,7-dimethyl-4,6-octadien-2-ol | 33.2 |
| yomogi alcohol                       | 1.3  |
| $\alpha$ -pinene                     | 14.4 |
| $\beta$ -myrcene                     | 1.4  |
| $\delta$ -cadinene                   | 0.5  |
| $\delta$ -elemene                    | 1.7  |
| $\tau$ -cadinol                      | 0.5  |



|                        | EO2  |
|------------------------|------|
| $\beta$ -caryophyllene | 2.0  |
| caryophyllene oxide    | 2.3  |
| cis-geraniol           | 1.7  |
| geranyl acetate        | 3.5  |
| linalool               | 19.9 |
| linalyl anthranilate   | 60.0 |
| nerol acetate          | 2.2  |
| trans-linalool oxide   | 2.1  |
| $\alpha$ -bergamotene  | 0.8  |
| $\alpha$ -copaene      | 0.6  |
| $\alpha$ -terpineol    | 3.8  |
| $\beta$ -bisabolene    | 0.7  |
| $\beta$ -myrcene       | 0.3  |

|                        | EO3  |
|------------------------|------|
| alcanfor               | 21.3 |
| borneol                | 4.6  |
| bornyl acetate         | 2.6  |
| camphene               | 3.5  |
| $\beta$ -caryophyllene | 6.8  |
| caryophyllene oxide    | 0.3  |
| chrysanthone           | 25.1 |
| eucalyptol             | 11.7 |
| humulene               | 7.5  |
| humulene epoxide 2     | 0.3  |
| limonene               | 1.3  |
| <i>o</i> -cymene       | 1.3  |
| terpinen-4-ol          | 0.6  |
| thujone                | 7.8  |
| viridiflorol           | 0.2  |
| $\alpha$ -pinene       | 3.0  |
| $\beta$ -pinene        | 1.4  |
| $\gamma$ -terpinene    | 0.5  |

|                        | E04  |
|------------------------|------|
| borneol                | 1.5  |
| carvacrol              | 7.2  |
| $\beta$ -caryophyllene | 2.3  |
| caryophyllene oxide    | 0.6  |
| eucalyptol             | 0.3  |
| limonene               | 0.3  |
| linalool               | 5.2  |
| methyl thymyl ether    | 0.2  |
| p-cymene               | 10.5 |
| terpinen-4-ol          | 1.8  |
| thymol                 | 66.3 |
| $\alpha$ -citral       | 0.1  |
| $\alpha$ -pinene       | 0.4  |
| $\alpha$ -terpinene    | 0.4  |
| $\alpha$ -terpineol    | 0.2  |
| $\beta$ -myrcene       | 0.5  |
| $\gamma$ -terpinene    | 2.3  |

|                     | E05  |
|---------------------|------|
| eucalyptol          | 14.9 |
| globulol            | 0.4  |
| limonene            | 2.0  |
| linalool, oxide     | 0.2  |
| longifolene         | 0.2  |
| o-cymene            | 3.5  |
| terpinen-4-ol       | 37.5 |
| terpinolene         | 1.7  |
| viridiflorene       | 1.1  |
| $\alpha$ -gurjunene | 0.2  |
| $\alpha$ -pinene    | 11.1 |
| $\alpha$ -terpinene | 4.6  |
| $\alpha$ -terpineol | 8.1  |
| $\beta$ -myrcene    | 0.2  |
| $\beta$ -pinene     | 2.5  |
| $\gamma$ -terpinene | 11.8 |

|                         | EO6  |
|-------------------------|------|
| 6-methyl-5-hepten-2-one | 0.3  |
| $\beta$ -caryophyllene  | 31.4 |
| caryophyllene oxide     | 5.5  |
| cis-geraniol            | 2.5  |
| citronellal             | 26.3 |
| eucalyptol              | 0.7  |
| humulene epoxide 2      | 0.9  |
| limonene                | 1.6  |
| linalool                | 0.8  |
| $\alpha$ -citral        | 28.2 |
| $\alpha$ -copaene       | 0.7  |
| $\gamma$ -cadinene      | 0.6  |
| $\delta$ -cadinene      | 0.5  |

|                        | EO7  |
|------------------------|------|
| 3-carene               | 10.8 |
| bornyl acetate         | 13.4 |
| calamenene             | 0.7  |
| carvone                | 0.3  |
| $\beta$ -caryophyllene | 21.4 |
| cis-verbenol           | 0.5  |
| crypton                | 3.7  |
| cumaldehyde            | 0.5  |
| humulene               | 1.2  |
| isopinocarveol         | 0.5  |
| limonene               | 10.9 |
| linalool               | 0.2  |
| <i>o</i> -cymene       | 2.1  |
| <i>p</i> -cymen-8-ol   | 0.8  |
| trans-2-carene-4-ol    | 0.6  |
| $\alpha$ -copaene      | 0.9  |
| $\alpha$ -muurolene    | 1.1  |
| $\alpha$ -pinene       | 12.5 |
| $\alpha$ -terpineol    | 0.4  |
| $\beta$ -cubebene      | 1.2  |
| $\beta$ -phellandrene  | 7.0  |
| $\beta$ -pinene        | 7.6  |
| $\delta$ -cadinene     | 1.6  |

|                                    | EO8  |
|------------------------------------|------|
| 1-indanone                         | 3.8  |
| 2,6-dimethyl-2,6-octadiene         | 0.6  |
| 2-pentadecanone, 6,10,14-trimethyl | 0.4  |
| acetic acid                        | 5.0  |
| cis-geraniol                       | 12.9 |
| citronellol                        | 26.3 |
| citronellyl butyrate               | 1.5  |
| citronellyl formate                | 8.0  |
| geraniol formate                   | 3.8  |
| geranyl isobutyrate                | 1.2  |
| geranyl propionate                 | 0.8  |
| heptanoic acid                     | 1.2  |
| hexanoic acid                      | 0.6  |
| isomenthone                        | 4.6  |
| limonene                           | 8.4  |
| linalool                           | 9.6  |
| linalyl anthranilate               | 6.8  |
| o-cymene                           | 1.3  |
| rose oxide                         | 0.9  |
| $\alpha$ -pinene                   | 0.5  |
| $\beta$ -myrcene                   | 0.4  |
| $\beta$ -pinene                    | 1.2  |

|                        | EO9  |
|------------------------|------|
| borneol                | 0.4  |
| carvacrol              | 76.5 |
| $\beta$ -caryophyllene | 6.7  |
| caryophyllene oxide    | 2.3  |
| eucalyptol             | 0.4  |
| limonene               | 0.5  |
| linalool               | 2.4  |
| p-cymene               | 6.8  |
| terpinen-4-ol          | 0.5  |
| $\alpha$ -pinene       | 0.4  |
| $\alpha$ -terpinene    | 0.3  |
| $\beta$ -myrcene       | 0.8  |
| $\gamma$ -terpinene    | 1.9  |

|                             | EO10 |
|-----------------------------|------|
| acetic acid, cinnamyl ester | 1.0  |
| calamenene                  | 0.3  |
| $\beta$ -caryophyllene      | 15.5 |
| cis-geraniol                | 1.5  |
| cis- $\beta$ -farnesene     | 13.9 |
| eucalyptol                  | 0.2  |
| eugenol                     | 0.6  |
| farnesol                    | 2.6  |
| farnesyl acetate            | 3.5  |
| geranyl acetate             | 12.2 |
| germacrene d                | 18.2 |
| humulene                    | 4.3  |
| linalool                    | 10.4 |
| methyl benzoate             | 2.1  |
| p-methylanisole             | 3.3  |
| $\alpha$ -cadinol           | 1.1  |
| $\alpha$ -copaene           | 1.2  |
| $\beta$ -elemene            | 0.5  |
| $\beta$ -ylangene           | 0.5  |
| $\gamma$ -cadinene          | 1.0  |
| $\gamma$ -muurolene         | 1.8  |
| $\delta$ -cadinene          | 3.8  |
| $\tau$ -cadinol             | 0.6  |

|                                       | EO11 |
|---------------------------------------|------|
| 3,7-octadiene-2,6-diol, 2,6-dimethyl- | 0.2  |
| benzyl benzoate                       | 6.4  |
| camphene                              | 0.4  |
| camphor                               | 5.7  |
| cis-geraniol                          | 1.7  |
| eucalyptol                            | 0.4  |
| geranyl acetate                       | 5.2  |
| limonene                              | 1.7  |
| linalool                              | 66.7 |
| o-cymene                              | 2.5  |
| salicylic acid, benzyl ester          | 2.2  |
| terpinen-4-ol                         | 0.2  |
| trans-linalool oxide                  | 0.6  |
| $\alpha$ -pinene                      | 3.4  |
| $\alpha$ -terpineol                   | 0.8  |
| $\beta$ -myrcene                      | 0.5  |
| $\beta$ -pinene                       | 0.3  |
| $\gamma$ -terpinene                   | 0.9  |

|                            | EO12 |
|----------------------------|------|
| 1-octen-3-ol               | 0.3  |
| 3-octanol                  | 0.3  |
| 3-octanone                 | 0.9  |
| borneol                    | 1.4  |
| butanoic acid, hexyl ester | 0.5  |
| $\beta$ -caryophyllene     | 2.7  |
| cis-geraniol               | 0.4  |
| cis- $\beta$ -farnesene    | 1.9  |
| cis- $\beta$ -ocimene      | 1.0  |
| eucalyptol                 | 2.4  |
| lavandulyl acetate         | 4.3  |
| limonene                   | 0.5  |
| linalool                   | 34.7 |
| linalyl acetate            | 41.4 |
| terpinen-4-ol              | 3.8  |
| $\alpha$ -pinene           | 0.2  |
| $\alpha$ -terpineol        | 1.3  |
| $\beta$ -myrcene           | 0.7  |
| $\beta$ -ocimene           | 1.3  |

|                             | EO13 |
|-----------------------------|------|
| 1,4-dihydroxy-p-menth-2-ene | 0.3  |
| 3-carene                    | 0.2  |
| $\beta$ -caryophyllene      | 2.2  |
| cis-geraniol                | 0.7  |
| eucalyptol                  | 40.8 |
| geranyl acetate             | 9.7  |
| humulene                    | 0.5  |
| isobutyl 2-methylbutyrate   | 0.5  |
| isobutyl isobutyrate        | 0.3  |
| limonene                    | 7.1  |
| linalool                    | 3.7  |
| linalyl anthranilate        | 1.2  |
| methyleugenol               | 2.0  |
| $\alpha$ -cymene            | 5.3  |
| p-cymen-8-ol                | 0.7  |
| pinocarveol                 | 0.2  |
| terpinen-4-ol               | 0.6  |
| $\alpha$ -pinene            | 17.4 |
| $\alpha$ -terpineol         | 3.9  |
| $\alpha$ -terpineol acetate | 1.9  |
| $\beta$ -myrcene            | 0.2  |
| $\beta$ -pinene             | 0.2  |
| $\gamma$ -elemene           | 0.2  |

|                                     | EO14 |
|-------------------------------------|------|
| 1,2-dithiolane                      | 0.5  |
| 1,2-dithiolane, 1,1-dioxide         | 2.8  |
| 3-vinyl-1,2-dithiacyclohex-4-ene    | 2.6  |
| diallyl disulphide                  | 57.6 |
| diallyl sulfide                     | 3.8  |
| dimethyl trisulfide                 | 0.5  |
| disulfide, methyl 2-propenyl        | 2.7  |
| eucalyptol                          | 0.3  |
| limonene                            | 0.5  |
| trans-3,5-diethyl-1,2,4-trithiolane | 0.3  |
| trisulfide, di-2-propenyl           | 2.1  |
| trisulfide, methyl 2-propenyl       | 26.1 |



|                             | EO15 |
|-----------------------------|------|
| cis-geraniol                | 1.1  |
| cis- $\beta$ -terpineol     | 0.7  |
| eucalyptol                  | 34.7 |
| limonene                    | 2.0  |
| linalool                    | 5.0  |
| linalyl anthranilate        | 8.2  |
| nerolidol                   | 1.3  |
| <i>o</i> -cymene            | 0.4  |
| sabinene                    | 0.3  |
| $\alpha$ -pinene            | 1.3  |
| $\alpha$ -terpineol         | 1.9  |
| $\alpha$ -terpineol acetate | 41.8 |
| $\beta$ -myrcene            | 1.1  |
| $\beta$ -pinene             | 0.3  |

|                     | EO16 |
|---------------------|------|
| limonene            | 66.7 |
| <i>o</i> -cymene    | 7.6  |
| sabinene            | 0.2  |
| terpinolene         | 0.9  |
| $\alpha$ -pinene    | 2.4  |
| $\alpha$ -terpineol | 0.3  |
| $\beta$ -myrcene    | 1.6  |
| $\beta$ -pinene     | 1.3  |
| $\gamma$ -terpinene | 19.0 |

|                         | EO17 |
|-------------------------|------|
| 4-methoxycinnamaldehyde | 1.1  |
| borneol                 | 1.1  |
| $\beta$ -caryophyllene  | 1.3  |
| caryophyllene oxide     | 0.6  |
| cis-3-pinane            | 34.1 |
| dhs activator           | 0.6  |
| elemol                  | 1.1  |
| estragole               | 0.2  |
| eucalyptol              | 0.6  |
| limonene                | 1.4  |
| linalool                | 18.0 |
| myrtenal                | 0.5  |
| myrtenol                | 1.0  |
| <i>o</i> -cymene        | 0.5  |
| pinocarveol             | 0.3  |
| sabinene                | 0.6  |
| spathulenol             | 1.1  |
| terpinen-4-ol           | 0.9  |
| trans-pinocamphone      | 18.9 |
| $\alpha$ -pinene        | 8.6  |
| $\alpha$ -terpineol     | 0.8  |
| $\beta$ -myrcene        | 0.3  |
| $\beta$ -pinene         | 6.4  |

|                                    | EO18 |
|------------------------------------|------|
| <i>p</i> -mentha-2,8-dien-1-ol     | 1.9  |
| carveol                            | 1.9  |
| carvone                            | 4.7  |
| caryophyllene oxide                | 0.4  |
| cis-carveol                        | 3.3  |
| cis-limonene oxide                 | 3.5  |
| limonene                           | 78.2 |
| limonene-1,2-diol                  | 0.7  |
| <i>o</i> -cymene                   | 0.3  |
| trans-limonene oxide               | 2.4  |
| trans- <i>p</i> -mentha-2,8-dienol | 2.1  |
| $\alpha$ -pinene                   | 0.4  |
| $\beta$ -myrcene                   | 0.3  |

|                        | EO19 |
|------------------------|------|
| . $\tau$ -muurolol     | 0.2  |
| $\beta$ -caryophyllene | 0.2  |
| citronellal            | 38.8 |
| citronellol            | 19.0 |
| citronellyl acetate    | 2.9  |
| elemol                 | 2.5  |
| eugenol                | 0.9  |
| geraniol               | 24.8 |
| germacrene D           | 0.7  |
| germacrene-D-4-ol      | 0.3  |
| isopulegol             | 0.7  |
| linalool               | 0.4  |
| $\alpha$ -cadinol      | 0.4  |
| $\alpha$ -citral       | 2.0  |
| $\beta$ -citral        | 1.2  |
| $\beta$ -elemene       | 0.9  |
| $\beta$ -myrcene       | 3.0  |
| $\gamma$ -muurolene    | 0.3  |
| $\delta$ -cadinene     | 0.9  |

|                        | EO20 |
|------------------------|------|
| borneol                | 2.7  |
| bornyl acetate         | 55.0 |
| camphene               | 18.1 |
| camphor                | 0.4  |
| $\beta$ -caryophyllene | 0.9  |
| caryophyllene oxide    | 1.3  |
| crypton                | 0.6  |
| humulene               | 0.5  |
| humulene epoxide 2     | 0.6  |
| limonene               | 3.9  |
| o-cymene               | 0.4  |
| p-cymen-7-ol           | 0.2  |
| p-cymen-8-ol           | 0.7  |
| santene                | 1.0  |
| tricyclene             | 1.5  |
| $\alpha$ -bisabolol    | 0.4  |
| $\alpha$ -pinene       | 8.4  |
| $\alpha$ -terpineol    | 0.4  |
| $\beta$ -bisabolene    | 0.2  |
| $\beta$ -phellandrene  | 1.1  |
| $\beta$ -pinene        | 1.6  |

|                             | EO21 |
|-----------------------------|------|
| 1,4-dihydroxy-p-menth-2-ene | 0.5  |
| camphene                    | 0.4  |
| estragole                   | 0.3  |
| eucalyptol                  | 57.0 |
| limonene                    | 22.8 |
| m-cymene                    | 13.4 |
| palmitic acid               | 1.6  |
| sabinene                    | 0.6  |
| $\alpha$ -pinene            | 0.4  |
| $\beta$ -pinene             | 3.1  |

|                                                              | EO22 |
|--------------------------------------------------------------|------|
| 2,2,7,7-tetramethyltricyclo[6.2.1.0~1,6~]undeca-3,5,9-triene | 2.4  |
| 2-methoxy-4-propylphenol                                     | 3.0  |
| 2-methoxy-phenol                                             | 4.2  |
| 2-methyl-phenol                                              | 1.3  |
| 3-methyl-1,2-cyclopentanedione                               | 1.2  |
| 4-ethyl-2-methoxyphenol                                      | 7.3  |
| 8,14-cedranoxide                                             | 0.3  |
| calamenene                                                   | 17.4 |
| $\beta$ -caryophyllene                                       | 1.0  |
| cedrene                                                      | 8.8  |
| cedrol                                                       | 0.5  |
| creosol                                                      | 9.3  |
| cubenol                                                      | 2.7  |
| humulene                                                     | 1.6  |
| isoeugenol                                                   | 1.9  |
| isodene                                                      | 3.7  |
| m-cresol                                                     | 1.4  |
| phenol                                                       | 1.0  |
| $\alpha$ -cadinol                                            | 0.5  |
| $\alpha$ -calacorene                                         | 6.3  |
| $\alpha$ -curcumene                                          | 1.1  |
| $\alpha$ -muurolene                                          | 4.6  |
| $\delta$ -cadinene                                           | 18.6 |

|                  | EO23 |
|------------------|------|
| bornyl acetate   | 0.6  |
| camphene         | 0.3  |
| camphor          | 3.8  |
| chrysanthone     | 88.5 |
| eucalyptol       | 0.3  |
| fenchone         | 2.7  |
| limonene         | 0.3  |
| sabinene         | 0.3  |
| terpinen-4-ol    | 0.7  |
| thujone          | 1.8  |
| $\alpha$ -pinene | 0.4  |
| $\beta$ -myrcene | 0.3  |

|                         | EO24 |
|-------------------------|------|
| 6-methyl-5-hepten-2-one | 0.6  |
| borneol                 | 1.1  |
| camphene                | 5.7  |
| cis-geraniol            | 0.4  |
| elemol                  | 0.5  |
| eucalyptol              | 7.0  |
| limonene                | 1.1  |
| linalool                | 0.3  |
| nerolidol               | 0.6  |
| zingiberene             | 29.9 |
| $\alpha$ -bergamotene   | 0.4  |
| $\alpha$ -copaene       | 0.6  |
| $\alpha$ -curcumene     | 31.6 |
| $\alpha$ -farnesene     | 4.3  |
| $\alpha$ -pinene        | 1.7  |
| $\alpha$ -terpineol     | 0.7  |
| $\beta$ -bisabolene     | 10.6 |
| $\beta$ -elemene        | 1.2  |
| $\beta$ -eudesmol       | 0.3  |
| $\beta$ -myrcene        | 0.6  |
| $\gamma$ -muurolene     | 0.7  |

|                         | EO25 |
|-------------------------|------|
| 2-carene-10-ol          | 28.1 |
| carotol                 | 1.3  |
| carvacrol               | 0.3  |
| $\beta$ -caryophyllene  | 0.7  |
| caryophyllene oxide     | 0.5  |
| cis- $\beta$ -farnesene | 0.9  |
| cumaldehyde             | 37.9 |
| limonene                | 0.3  |
| p-cymen-7-ol            | 0.5  |
| p-cymen-8-ol            | 0.2  |
| p-cymene                | 7.6  |
| sabinene                | 0.2  |
| $\alpha$ -phellandrene  | 1.0  |
| $\alpha$ -pinene        | 0.3  |
| $\beta$ -myrcene        | 0.4  |
| $\beta$ -phellandrene   | 0.3  |
| $\beta$ -pinene         | 5.6  |
| $\gamma$ -terpinene     | 13.9 |

|                        | EO26 |
|------------------------|------|
| $\beta$ -caryophyllene | 3.2  |
| caryophyllene oxide    | 0.6  |
| globulol               | 1.1  |
| ledene oxide-(I)       | 0.4  |
| patchouli alcohol      | 45.4 |
| seychellene            | 6.8  |
| $\alpha$ -guaiene      | 15.3 |
| $\alpha$ -panasinsene  | 0.3  |
| $\alpha$ -patchoulene  | 5.9  |
| $\beta$ -guaiene       | 19.0 |
| $\beta$ -patchoulene   | 2.1  |

|                     | EO27 |
|---------------------|------|
| decanal             | 0.3  |
| limonene            | 95.1 |
| linalool            | 0.4  |
| linalyl acetate     | 0.6  |
| sabinene            | 0.2  |
| $\alpha$ -pinene    | 0.5  |
| $\beta$ -pinene     | 2.7  |
| $\gamma$ -terpinene | 0.1  |

|                  | EO28 |
|------------------|------|
| carvone          | 0.3  |
| eucalyptol       | 83.9 |
| limonene         | 6.1  |
| p-cymene         | 8.1  |
| $\alpha$ -pinene | 1.1  |
| $\beta$ -myrcene | 0.3  |
| $\beta$ -pinene  | 0.2  |

|                        | EO29 |
|------------------------|------|
| 3-carene               | 16.6 |
| bornyl acetate         | 1.4  |
| camphene               | 0.9  |
| $\beta$ -caryophyllene | 16.7 |
| caryophyllene oxide    | 3.5  |
| cis-verbenol           | 0.2  |
| humulene               | 1.2  |
| humulene epoxide 2     | 0.3  |
| limonene               | 11.2 |
| longifolene            | 2.0  |
| myrtenol               | 0.2  |
| $\alpha$ -cymene       | 0.5  |
| p-cymen-8-ol           | 1.6  |
| pinocarveol            | 0.4  |
| terpinolene            | 2.0  |
| $\alpha$ -cubebene     | 0.5  |
| $\alpha$ -pinene       | 22.8 |
| $\alpha$ -terpineol    | 0.9  |
| $\beta$ -pinene        | 17.1 |



|                      | EO30 |
|----------------------|------|
| carvone              | 0.4  |
| cis-carveol          | 0.3  |
| limonene             | 26.1 |
| limonene oxide, cis- | 0.3  |
| linalool             | 13.8 |
| linalyl anthranilate | 45.3 |
| nerol acetate        | 0.7  |
| o-cymene             | 6.5  |
| sabinene             | 0.5  |
| $\alpha$ -pinene     | 0.7  |
| $\beta$ -bisabolene  | 0.2  |
| $\beta$ -myrcene     | 0.7  |
| $\beta$ -pinene      | 4.6  |

|                         | E031 |
|-------------------------|------|
| (E)- $\beta$ -farnesene | 0.6  |
| 4-epi-cubebol           | 1.1  |
| $\beta$ -caryophyllene  | 13.7 |
| caryophyllene oxide     | 2.9  |
| humulene                | 3.6  |
| limonene                | 7.5  |
| o-cymene                | 3.0  |
| p-cymen-8-ol            | 0.6  |
| sabinene                | 5.9  |
| spathulenol             | 0.8  |
| terpinen-4-ol           | 6.3  |
| terpinolene             | 0.9  |
| trans-calamenene        | 0.9  |
| $\alpha$ -cadinol       | 0.4  |
| $\alpha$ -copaene       | 1.0  |
| $\alpha$ -cubebene      | 0.9  |
| $\alpha$ -muurolene     | 0.8  |
| $\alpha$ -pinene        | 27.1 |
| $\alpha$ -terpineol     | 0.6  |
| $\beta$ -elemene        | 3.6  |
| $\beta$ -myrcene        | 9.3  |
| $\beta$ -pinene         | 3.6  |
| $\gamma$ -elemene       | 2.0  |
| $\gamma$ -muurolene     | 1.5  |
| $\gamma$ -terpinene     | 1.0  |
| $\delta$ -cadinene      | 0.4  |

|                                                              | EO32 |
|--------------------------------------------------------------|------|
| 1,8-dimethylnaphthalene                                      | 4.6  |
| 2,2,7,7-tetramethyltricyclo[6.2.1.0~1,6~]undeca-3,5,9-triene | 1.7  |
| 2-methoxy-4-propylphenol                                     | 2.7  |
| 2-methoxy-phenol                                             | 6.6  |
| 2-methyl-phenol                                              | 1.2  |
| 3-methyl-1,2-cyclopentanedione                               | 0.8  |
| 4-epi-cubebol                                                | 2.8  |
| benzocycloheptatriene                                        | 0.9  |
| cadalene                                                     | 5.5  |
| cadina-1(2),4-diene                                          | 2.7  |
| calamenene                                                   | 18.1 |
| cedrene                                                      | 8.2  |
| creosol                                                      | 7.2  |
| dihydrocurcumene                                             | 3.4  |
| isoeugenol                                                   | 1.6  |
| m-cresol                                                     | 1.3  |
| $\alpha$ -cadinol                                            | 0.6  |
| $\alpha$ -calacorene                                         | 5.8  |
| $\alpha$ -muurolene                                          | 4.4  |
| $\beta$ -cadinene                                            | 0.7  |
| $\delta$ -cadinene                                           | 18.5 |
| $\delta$ -cadinol                                            | 0.8  |

|                       | EO33 |
|-----------------------|------|
| anethole              | 78.1 |
| camphor               | 0.2  |
| estragole             | 2.2  |
| fenchone              | 3.4  |
| limonene              | 3.4  |
| $\alpha$ -cymene      | 0.4  |
| p-acetonylanisole     | 4.7  |
| p-anisaldehyde        | 6.3  |
| $\alpha$ -bergamotene | 0.1  |
| $\alpha$ -pinene      | 1.0  |
| $\beta$ -myrcene      | 0.2  |

|                            | E034 |
|----------------------------|------|
| carveol                    | 0.4  |
| carvone                    | 1.4  |
| $\beta$ -caryophyllene     | 0.2  |
| caryophyllene oxide        | 0.4  |
| cis-p-mentha-2,8-dien-1-ol | 0.4  |
| geranic acid               | 1.0  |
| limonene                   | 32.2 |
| limonene oxide, cis-       | 0.7  |
| limonene oxide, trans-     | 0.5  |
| linalool                   | 6.4  |
| linalyl anthranilate       | 25.0 |
| nerol acetate              | 1.6  |
| o-cymene                   | 17.4 |
| sabinene                   | 0.2  |
| trans-p-mentha-2,8-dienol  | 0.4  |
| $\alpha$ -bergamotene      | 0.3  |
| $\alpha$ -citral           | 4.8  |
| $\alpha$ -pinene           | 0.4  |
| $\beta$ -bisabolene        | 0.5  |
| $\beta$ -citral            | 2.1  |
| $\beta$ -myrcene           | 0.4  |
| $\beta$ -pinene            | 3.2  |

|                            | E035 |
|----------------------------|------|
| carveol                    | 0.3  |
| caryophyllene oxide        | 0.4  |
| cis-geraniol               | 2.2  |
| cis-p-mentha-2,8-dien-1-ol | 0.4  |
| geranic acid               | 1.6  |
| geranyl acetate            | 1.0  |
| limonene                   | 59.2 |
| limonene glycol            | 2.9  |
| limonene oxide, trans-     | 0.7  |
| myrtenal                   | 0.2  |
| nerol acetate              | 0.9  |
| o-cymene                   | 7.9  |
| sabinene                   | 1.0  |
| $\alpha$ -citral           | 7.8  |
| $\alpha$ -pinene           | 1.1  |
| $\beta$ -citral            | 3.3  |
| $\beta$ -myrcene           | 0.7  |
| $\beta$ -pinene            | 7.2  |
| $\gamma$ -terpinene        | 1.1  |

|                                      | E036 |
|--------------------------------------|------|
| artemisia alcohol                    | 1.7  |
| borneol                              | 0.8  |
| borneol, butyrate                    | 1.7  |
| bornyl acetate                       | 1.0  |
| camphene                             | 0.4  |
| $\beta$ -caryophyllene               | 6.0  |
| caryophyllene oxide                  | 0.7  |
| cis-3-pinane                         | 0.3  |
| eucalyptol                           | 2.5  |
| germacrene d                         | 1.8  |
| limonene                             | 7.3  |
| o-cymene                             | 0.2  |
| pinocarveol                          | 4.8  |
| pinocarpone                          | 0.3  |
| sabinene                             | 0.4  |
| sativene                             | 0.7  |
| spathulenol                          | 1.3  |
| terpinen-4-ol                        | 0.3  |
| terpinolene                          | 0.2  |
| trans-2,7-dimethyl-4,6-octadien-2-ol | 49.3 |
| yomogi alcohol                       | 1.3  |
| $\alpha$ -pinene                     | 18.9 |
| $\beta$ -myrcene                     | 1.7  |
| $\delta$ -elemene                    | 1.5  |

|                        | EO37 |
|------------------------|------|
| 1-octen-3-ol           | 0.9  |
| borneol                | 1.0  |
| carvacrol              | 71.5 |
| carvacrol acetate      | 0.3  |
| $\beta$ -caryophyllene | 5.0  |
| caryophyllene oxide    | 1.0  |
| eucalyptol             | 0.4  |
| limonene               | 0.2  |
| linalool               | 1.5  |
| p-cymene               | 5.6  |
| spathulenol            | 0.3  |
| terpinen-4-ol          | 1.1  |
| thymol                 | 1.6  |
| $\alpha$ -pinene       | 0.3  |
| $\alpha$ -terpinene    | 0.5  |
| $\alpha$ -terpineol    | 0.2  |
| $\beta$ -bisabolene    | 4.1  |
| $\beta$ -myrcene       | 0.3  |
| $\gamma$ -cadinene     | 0.4  |
| $\gamma$ -muurolene    | 0.6  |
| $\gamma$ -terpinene    | 2.3  |
| $\delta$ -cadinene     | 0.8  |

|                        | EO38 |
|------------------------|------|
| borneol                | 1.3  |
| bornyl acetate         | 0.4  |
| camphene               | 0.8  |
| camphor                | 21.4 |
| $\beta$ -caryophyllene | 6.2  |
| eucalyptol             | 53.2 |
| eugenol                | 0.7  |
| limonene               | 1.7  |
| o-cymene               | 0.4  |
| terpinen-4-ol          | 0.4  |
| $\alpha$ -pinene       | 6.7  |
| $\alpha$ -terpineol    | 1.2  |
| $\beta$ -myrcene       | 0.3  |
| $\beta$ -pinene        | 5.3  |

|                             | EO39 |
|-----------------------------|------|
| 2-methoxycinnamaldehyde     | 0.2  |
| acetic acid, cinnamyl ester | 2.6  |
| acetyeugenol                | 1.3  |
| $\beta$ -caryophyllene      | 4.0  |
| caryophyllene oxide         | 0.2  |
| eugenol                     | 34.6 |
| humulene                    | 0.6  |
| limonene                    | 0.2  |
| linalool                    | 3.2  |
| <i>o</i> -cymene            | 0.7  |
| tetradecanal                | 0.5  |
| trans-3-phenyl-2-propenal   | 49.1 |
| $\alpha$ -copaene           | 0.5  |
| $\alpha$ -phellandrene      | 0.3  |
| $\alpha$ -pinene            | 0.2  |
| $\alpha$ -terpineol         | 0.3  |
| $\beta$ -isosafrole         | 0.9  |
| $\beta$ -phellandrene       | 0.5  |

|                  | EO40 |
|------------------|------|
| carvone          | 0.5  |
| cis-carveol      | 0.2  |
| eucalyptol       | 85.9 |
| limonene         | 4.5  |
| <i>o</i> -cymene | 8.3  |
| $\alpha$ -pinene | 0.6  |

|                            | EO41 |
|----------------------------|------|
| carvone                    | 0.8  |
| cis-carveol                | 0.5  |
| cis-p-mentha-2,8-dien-1-ol | 0.3  |
| limonene                   | 95.0 |
| linalool                   | 0.8  |
| sabinene                   | 0.2  |
| trans-p-mentha-2,8-dienol  | 0.3  |
| $\alpha$ -pinene           | 0.4  |
| $\beta$ -myrcene           | 1.7  |



|                             | EO42 |
|-----------------------------|------|
| $\beta$ -caryophyllene      | 1.8  |
| eucalyptol                  | 66.0 |
| ledol                       | 5.4  |
| limonene                    | 5.9  |
| linalool                    | 0.2  |
| $\alpha$ -cymene            | 1.5  |
| terpinen-4-ol               | 0.9  |
| terpinolene                 | 0.4  |
| $\alpha$ -pinene            | 5.3  |
| $\alpha$ -terpineol         | 8.3  |
| $\alpha$ -terpineol acetate | 1.4  |
| $\beta$ -myrcene            | 0.7  |
| $\beta$ -pinene             | 1.5  |
| $\gamma$ -terpinene         | 0.8  |

|                     | EO43 |
|---------------------|------|
| artemisia alcohol   | 2.0  |
| borneol             | 0.9  |
| camphene            | 3.0  |
| camphor             | 27.0 |
| cumaldehyde         | 0.4  |
| eucalyptol          | 2.0  |
| germacrene D        | 0.3  |
| myrtenol            | 0.3  |
| $\alpha$ -cymene    | 1.2  |
| pinocarveol         | 0.7  |
| sabinene            | 0.9  |
| santolina triene    | 2.2  |
| terpinen-4-ol       | 2.5  |
| thujone             | 44.6 |
| yomogi alcohol      | 1.6  |
| $\alpha$ -pinene    | 0.2  |
| $\beta$ -thujone    | 9.9  |
| $\gamma$ -terpinene | 0.3  |

|                             | EO44 |
|-----------------------------|------|
| $\beta$ -caryophyllene      | 9.1  |
| cis- $\beta$ -terpineol     | 0.7  |
| eucalyptol                  | 52.7 |
| limonene                    | 3.6  |
| linalool                    | 2.2  |
| p-cymene                    | 18.4 |
| p-menth-3-en-1-ol           | 0.3  |
| terpinolene                 | 0.5  |
| $\alpha$ -pinene            | 1.5  |
| $\alpha$ -terpineol         | 7.6  |
| $\alpha$ -terpineol acetate | 1.2  |
| $\beta$ -myrcene            | 0.6  |
| $\beta$ -pinene             | 0.8  |
| $\gamma$ -terpinene         | 0.9  |

|                        | EO45 |
|------------------------|------|
| 3-carene               | 5.9  |
| calamenene             | 0.3  |
| $\beta$ -caryophyllene | 33.6 |
| caryophyllene oxide    | 9.7  |
| humulene               | 2.4  |
| humulene epoxide 2     | 0.5  |
| limonene               | 11.1 |
| linalool               | 0.6  |
| p-cymene               | 1.1  |
| sabinene               | 7.2  |
| spathulenol            | 0.4  |
| terpinen-4-ol          | 0.4  |
| $\alpha$ -bergamotene  | 0.1  |
| $\alpha$ -copaene      | 5.4  |
| $\alpha$ -muurolene    | 0.4  |
| $\alpha$ -pinene       | 6.9  |
| $\beta$ -bisabolene    | 2.0  |
| $\beta$ -cubebene      | 0.7  |
| $\beta$ -elemene       | 0.7  |
| $\beta$ -pinene        | 6.3  |
| $\beta$ -selinene      | 0.5  |
| $\gamma$ -muurolene    | 0.2  |
| $\delta$ -cadinene     | 0.9  |
| $\delta$ -elemene      | 2.7  |

|                         | EO46 |
|-------------------------|------|
| 1-octen-3-ol            | 0.5  |
| borneol                 | 2.2  |
| camphene                | 1.0  |
| camphor                 | 2.4  |
| carvacrol               | 6.6  |
| $\beta$ -caryophyllene  | 2.4  |
| caryophyllene oxide     | 0.7  |
| cis- $\beta$ -terpineol | 0.2  |
| eucalyptol              | 1.2  |
| limonene                | 0.5  |
| linalool                | 7.5  |
| methyl thymyl ether     | 0.4  |
| p-cymene                | 18.2 |
| terpinen-4-ol           | 3.0  |
| thymol                  | 44.4 |
| $\alpha$ -pinene        | 1.3  |
| $\alpha$ -terpinene     | 0.6  |
| $\alpha$ -terpineol     | 0.2  |
| $\beta$ -myrcene        | 1.1  |
| $\beta$ -pinene         | 0.3  |
| $\gamma$ -terpinene     | 5.2  |

|                             | EO47 |
|-----------------------------|------|
| 1,4-dihydroxy-p-menth-2-ene | 0.8  |
| $\beta$ -caryophyllene      | 0.6  |
| caryophyllene oxide         | 1.0  |
| cis-sabinene hydrate        | 2.9  |
| cis- $\beta$ -terpineol     | 15.4 |
| eucalyptol                  | 1.0  |
| limonene                    | 0.8  |
| linalol oxide               | 0.5  |
| linalool                    | 40.7 |
| $\alpha$ -cymene            | 8.5  |
| p-cymen-8-ol                | 0.6  |
| sabinene                    | 2.6  |
| terpinen-4-ol               | 23.2 |
| $\alpha$ -pinene            | 0.4  |
| $\alpha$ -terpineol         | 0.4  |
| $\beta$ -myrcene            | 0.5  |

|                        | EO48 |
|------------------------|------|
| acetyeugenol           | 9.9  |
| $\beta$ -caryophyllene | 8.8  |
| eugenol                | 80.1 |
| humulene               | 1.0  |
| methylsalicylate       | 0.2  |

|                             | EO49 |
|-----------------------------|------|
| 3-carene                    | 29.3 |
| camphene                    | 0.6  |
| cedrene                     | 0.5  |
| cedrol                      | 4.7  |
| cis-verbenol                | 0.3  |
| eucalyptol                  | 0.5  |
| limonene                    | 4.0  |
| linalool                    | 0.7  |
| o-cymene                    | 1.4  |
| p-cymen-8-ol                | 1.2  |
| sabinene                    | 0.7  |
| terpinen-4-ol               | 1.5  |
| terpinolene                 | 0.7  |
| trans-2-carene-4-ol         | 0.4  |
| verbenone                   | 0.3  |
| $\alpha$ -pinene            | 47.7 |
| $\alpha$ -terpineol         | 0.4  |
| $\alpha$ -terpineol acetate | 3.8  |
| $\beta$ -pinene             | 1.3  |

|                             | EO50 |
|-----------------------------|------|
| eucalyptol                  | 2.9  |
| eugenol                     | 2.2  |
| geranyl acetate             | 0.2  |
| isoeugenol                  | 0.3  |
| limonene                    | 7.8  |
| linalool                    | 0.5  |
| methyleugenol               | 0.3  |
| myristicin                  | 21.9 |
| $\alpha$ -cymene            | 1.6  |
| sabinene                    | 13.9 |
| terpinen-4-ol               | 16.6 |
| terpinolene                 | 0.7  |
| $\alpha$ -copaene           | 0.3  |
| $\alpha$ -phellandrene      | 0.8  |
| $\alpha$ -pinene            | 12.0 |
| $\alpha$ -terpinene         | 0.6  |
| $\alpha$ -terpineol         | 0.7  |
| $\alpha$ -terpineol acetate | 0.1  |
| $\beta$ -isosafrole         | 1.5  |
| $\beta$ -pinene             | 11.1 |
| $\gamma$ -terpinene         | 3.8  |

|                        | EO51 |
|------------------------|------|
| $\beta$ -caryophyllene | 0.2  |
| eucalyptol             | 0.9  |
| isomenthone            | 10.0 |
| isopulegol             | 0.9  |
| levomenthol            | 0.4  |
| limonene               | 0.5  |
| menthol                | 57.4 |
| menthol, acetate       | 5.0  |
| menthone               | 23.2 |
| piperitenone           | 0.7  |
| pulegone               | 0.4  |
| $\alpha$ -terpineol    | 0.3  |

|                         | E052 |
|-------------------------|------|
| 6-methyl-5-hepten-2-one | 1.3  |
| $\beta$ -caryophyllene  | 0.7  |
| cis-geraniol            | 0.6  |
| cis-verbenol            | 0.3  |
| citronellal             | 8.0  |
| citronellyl formate     | 1.1  |
| elemol                  | 0.5  |
| eucalyptol              | 0.6  |
| geranic acid            | 0.7  |
| geraniol                | 5.6  |
| limonene                | 9.5  |
| linalool                | 1.3  |
| sabinene                | 0.5  |
| terpinen-4-ol           | 0.2  |
| $\alpha$ -citral        | 33.7 |
| $\alpha$ -copaene       | 0.1  |
| $\alpha$ -pinene        | 1.6  |
| $\beta$ -citral         | 30.9 |
| $\beta$ -myrcene        | 0.4  |
| $\beta$ -pinene         | 2.1  |
| $\delta$ -cadinene      | 0.2  |

|                           | E053 |
|---------------------------|------|
| $\beta$ -caryophyllene    | 0.3  |
| caryophyllene oxide       | 0.3  |
| cis- $\alpha$ -bisabolene | 2.1  |
| cis- $\beta$ -farnesene   | 0.3  |
| estragole                 | 75.2 |
| levomenthol               | 0.4  |
| linalool                  | 19.7 |
| $\alpha$ -bergamotene     | 0.9  |
| $\alpha$ -citral          | 0.7  |



|                        | EO54 |
|------------------------|------|
| carvone                | 0.6  |
| $\beta$ -caryophyllene | 1.8  |
| cis-geraniol           | 76.5 |
| cis- $\beta$ -ocimene  | 0.3  |
| farnesol               | 0.7  |
| geranyl acetate        | 13.0 |
| humulene               | 0.2  |
| linalool               | 4.1  |
| nerol acetate          | 1.0  |
| $\alpha$ -citral       | 0.7  |
| $\beta$ -ocimene       | 1.1  |

|                             | EO55 |
|-----------------------------|------|
| eucalyptol                  | 53.9 |
| eugenol                     | 1.9  |
| limonene                    | 2.0  |
| linalool                    | 3.0  |
| methyleugenol               | 4.2  |
| myrtenol                    | 0.3  |
| $\alpha$ -cymene            | 2.4  |
| sabinene                    | 3.2  |
| terpinen-4-ol               | 3.0  |
| $\alpha$ -pinene            | 3.2  |
| $\alpha$ -terpineol acetate | 18.8 |
| $\beta$ -pinene             | 2.3  |
| $\gamma$ -terpinene         | 1.8  |

|                        | EO56 |
|------------------------|------|
| anethole               | 88.5 |
| $\beta$ -caryophyllene | 0.4  |
| estragole              | 3.8  |
| isohomogenol           | 0.2  |
| limonene               | 1.6  |
| linalool               | 0.9  |
| nerolidol              | 0.3  |
| p-acetonylanisole      | 0.9  |
| p-anisaldehyde         | 2.1  |
| terpinen-4-ol          | 0.3  |
| $\alpha$ -bergamotene  | 0.5  |
| $\alpha$ -pinene       | 0.3  |
| $\alpha$ -terpineol    | 0.2  |

|                        | EO57 |
|------------------------|------|
| 3-carene               | 0.5  |
| 4-epi-cubebol          | 1.7  |
| acetic acid            | 0.7  |
| bornyl acetate         | 1.0  |
| $\beta$ -caryophyllene | 9.1  |
| caryophyllene oxide    | 3.0  |
| cis-verbenol           | 1.8  |
| humulene               | 2.0  |
| humulene epoxide 2     | 1.1  |
| limonene               | 20.3 |
| myrtenyl acetate       | 0.3  |
| o-cymene               | 3.7  |
| p-cymen-8-ol           | 0.2  |
| pinocarveol            | 0.9  |
| sabinene               | 2.8  |
| terpinen-4-ol          | 0.6  |
| viridiflorol           | 0.5  |
| $\alpha$ -copaene      | 2.3  |
| $\alpha$ -cubebene     | 0.4  |
| $\alpha$ -muurolene    | 0.4  |
| $\alpha$ -phellandrene | 2.0  |
| $\alpha$ -pinene       | 27.0 |
| $\alpha$ -selinene     | 1.1  |
| $\alpha$ -terpineol    | 0.5  |
| $\beta$ -elemene       | 4.0  |
| $\beta$ -eudesmol      | 0.3  |
| $\beta$ -myrcene       | 3.0  |
| $\beta$ -phellandrene  | 1.0  |
| $\beta$ -pinene        | 1.0  |
| $\beta$ -selinene      | 1.6  |
| $\gamma$ -eudesmol     | 0.5  |
| $\delta$ -cadinene     | 2.1  |
| $\tau$ -cadinol        | 2.3  |

|                                        | EO58 |
|----------------------------------------|------|
| . $\tau$ -muurolol                     | 0.1  |
| calamenene                             | 0.7  |
| $\beta$ -caryophyllene                 | 7.3  |
| caryophyllene oxide                    | 0.2  |
| cinerolon                              | 4.6  |
| cubenol                                | 0.2  |
| cyclohexanone, 2-(1-methylethylidene)- | 1.0  |
| epi-bicyclosesquiphellandrene          | 0.9  |
| germacrene D                           | 5.2  |
| humulene                               | 1.1  |
| jasmone                                | 0.6  |
| limonene                               | 8.8  |
| myrtenal                               | 0.3  |
| pulegone                               | 59.8 |
| sabinene                               | 0.6  |
| terpinen-4-ol                          | 0.7  |
| thymol                                 | 1.2  |
| $\alpha$ -cadinol                      | 0.2  |
| $\alpha$ -cubebene                     | 0.5  |
| $\alpha$ -gurjunene                    | 0.4  |
| $\alpha$ -muurolene                    | 0.2  |
| $\alpha$ -pinene                       | 1.0  |
| $\beta$ -ocimene                       | 0.1  |
| $\beta$ -pinene                        | 3.8  |
| $\gamma$ -cadinene                     | 0.2  |
| $\gamma$ -terpinene                    | 0.1  |

|                         | EO59 |
|-------------------------|------|
| 1-octen-3-ol            | 0.7  |
| borneol                 | 0.6  |
| carvacrol               | 61.0 |
| $\beta$ -caryophyllene  | 13.6 |
| caryophyllene oxide     | 1.4  |
| cis- $\beta$ -terpineol | 0.2  |
| humulene                | 0.6  |
| limonene                | 0.3  |
| linalool                | 1.8  |
| p-cymene                | 7.1  |
| thymol                  | 0.5  |
| $\alpha$ -citral        | 0.2  |
| $\alpha$ -terpinene     | 1.5  |
| $\alpha$ -thujene       | 1.0  |
| $\beta$ -bisabolene     | 1.6  |
| $\beta$ -myrcene        | 1.6  |
| $\beta$ -phellandrene   | 0.3  |
| $\gamma$ -terpinene     | 6.0  |

|                        | EO60 |
|------------------------|------|
| 1-octen-3-ol           | 0.6  |
| borneol                | 2.5  |
| camphene               | 0.6  |
| carvacrol              | 0.7  |
| $\beta$ -caryophyllene | 3.4  |
| caryophyllene oxide    | 1.8  |
| eucalyptol             | 0.9  |
| isothymol methyl ether | 6.0  |
| limonene               | 0.4  |
| linalool               | 3.7  |
| methyl thymyl ether    | 10.7 |
| p-cymene               | 30.5 |
| thymol                 | 34.1 |
| $\alpha$ -pinene       | 0.9  |
| $\alpha$ -terpineol    | 0.3  |
| $\beta$ -myrcene       | 1.0  |
| $\gamma$ -muurolene    | 0.3  |
| $\gamma$ -terpinene    | 1.8  |

|                        | EO61 |
|------------------------|------|
| 1-octen-3-ol           | 0.5  |
| alcanfor               | 0.3  |
| borneol                | 0.3  |
| carvacrol              | 0.8  |
| $\beta$ -caryophyllene | 2.9  |
| caryophyllene oxide    | 0.6  |
| eucalyptol             | 0.5  |
| humulene               | 0.3  |
| isothymol methyl ether | 7.4  |
| limonene               | 0.4  |
| methyl thymyl ether    | 4.9  |
| p-cymen-8-ol           | 0.1  |
| p-cymene               | 18.5 |
| thymol                 | 34.7 |
| thymol acetate         | 0.3  |
| $\alpha$ -muurolene    | 0.2  |
| $\alpha$ -phellandrene | 0.2  |
| $\alpha$ -terpineol    | 0.2  |
| $\alpha$ -thujene      | 1.1  |
| $\beta$ -bisabolene    | 5.0  |
| $\beta$ -bourbonene    | 0.4  |
| $\beta$ -myrcene       | 1.3  |
| $\gamma$ -cadinene     | 0.4  |
| $\gamma$ -muurolene    | 0.6  |
| $\gamma$ -terpinene    | 17.1 |
| $\delta$ -cadinene     | 0.7  |
